# Supplementary material for: Morphological evolution and modularity of the caecilian skull
Source: PubMed Central journal article supplement (PMC6343317; doi:10.1186/s12862-018-1342-7), 2019-01-22
Supplement: 12862_2018_1342_MOESM1_ESM.pdf [file 12862_2018_1342_MOESM1_ESM.pdf]

**Morphological Evolution and Modularity of the Caecilian Skull***Carla Bardua, Mark Wilkinson, David J. Gower, Emma Sherratt, Anjali Goswami*

This document includes the following supplementary contents:

|                                                                                               |    |
|-----------------------------------------------------------------------------------------------|----|
| <b>Figure S1.</b> Landmarks and semilandmarks colour coded by the 16 cranial regions          | 2  |
| <b>Figure S2.</b> Network graphs displaying results from EMMLi analyses                       | 3  |
| <b>Figure S3.</b> Network graphs from EMMLi and CR analyses of the ten-module model           | 4  |
| <b>Figure S4.</b> Reconstructed morphologies represented by positive and negative ends of PC1 | 5  |
| <b>Figure S5.</b> Reconstructed morphologies represented by positive and negative ends of PC2 | 6  |
| <b>Figure S6.</b> Reconstructed morphologies represented by positive and negative ends of PC3 | 7  |
| <b>Figure S7.</b> Morphospace of all 35 specimens                                             | 8  |
| <b>Figure S8.</b> Phylomorphospace of all specimens                                           | 9  |
| <b>Figure S9.</b> Morphospace of the parietal module                                          | 10 |
| <b>Figure S10.</b> Morphospace of the frontal module                                          | 11 |
| <b>Figure S11.</b> Morphospace of the quadrate-squamosal module                               | 12 |
| <b>Figure S12.</b> Morphospace of the stapes module                                           | 13 |
| <b>Figure S13.</b> Morphospace of the pterygoid module                                        | 14 |
| <b>Figure S14.</b> Morphospace of the nasopremaxilla (dorsal) module                          | 15 |
| <b>Figure S15.</b> Morphospace of the maxillopalatine module                                  | 16 |
| <b>Figure S16.</b> Morphospace of the nasopremaxilla (palatal) module                         | 17 |
| <b>Figure S17.</b> Morphospace of the occipital module                                        | 18 |
| <b>Figure S18.</b> Morphospace of the ventral os basale-vomer module                          | 19 |
| <b>Figure S19.</b> Whole cranial morphology at (A) minimum and (B) maximum size               | 20 |
| <b>Figure S20.</b> Distribution of specimens in morphospace, colour-coded by centroid size    | 20 |
| <b>Figure S21.</b> Module morphologies at minimum and maximum size                            | 21 |
| <b>Figure S22.</b> The occipital module morphology at minimum and maximum size                | 22 |
| <b>Figure S23.</b> Landmarks and semilandmarks colour coded by magnitude of disparity         | 23 |
| <b>Table S1.</b> Results of EMMLi analysis for the 16 cranial regions                         | 24 |
| <b>Table S2.</b> Results of EMMLi analysis using subsampled data                              | 26 |
| <b>Table S3.</b> Results of EMMLi analysis using landmark only dataset                        | 28 |
| <b>Table S4.</b> Results of EMMLi analysis using allometry-corrected data                     | 29 |
| <b>Table S5.</b> Results of EMMLi analysis using phylogenetically-corrected data              | 31 |
| <b>Table S6.</b> Covariance Ratio results for the 16 cranial regions                          | 33 |
| <b>Table S7.</b> Covariance Ratio results, using only anatomical landmarks                    | 34 |
| <b>Table S8.</b> Covariance Ratio results, corrected for allometry                            | 35 |
| <b>Table S9.</b> Covariance Ratio results, corrected for phylogeny                            | 36 |
| <b>Table S10.</b> Results of EMMLi analysis for the ten identified cranial modules            | 37 |
| <b>Table S11.</b> Covariance Ratio results for the ten identified cranial modules             | 38 |
| <b>Table S12.</b> Summary of the PC axes                                                      | 39 |
| <b>Table S13.</b> Centroid size of all specimens                                              | 40 |
| <b>Table S14.</b> Differences in the observed means of disparity between the ten modules      | 42 |
| <b>Table S15.</b> Significance values for differences in rates of morphological evolution     | 43 |
| <b>Table S16.</b> Ecological data for all specimens in this study.                            | 44 |
| <b>Table S17.</b> Definitions for the 16 cranial regions analysed in this study               | 46 |
| <b>Table S18.</b> Description of curves                                                       | 49 |
| <b>Table S19.</b> Number of surface points projected onto each of the cranial regions         | 58 |
| <b>Table S20.</b> Alternative models of modular organisation tested in EMMLi analysis         | 59 |
| References for Additional File 1                                                              | 60 |

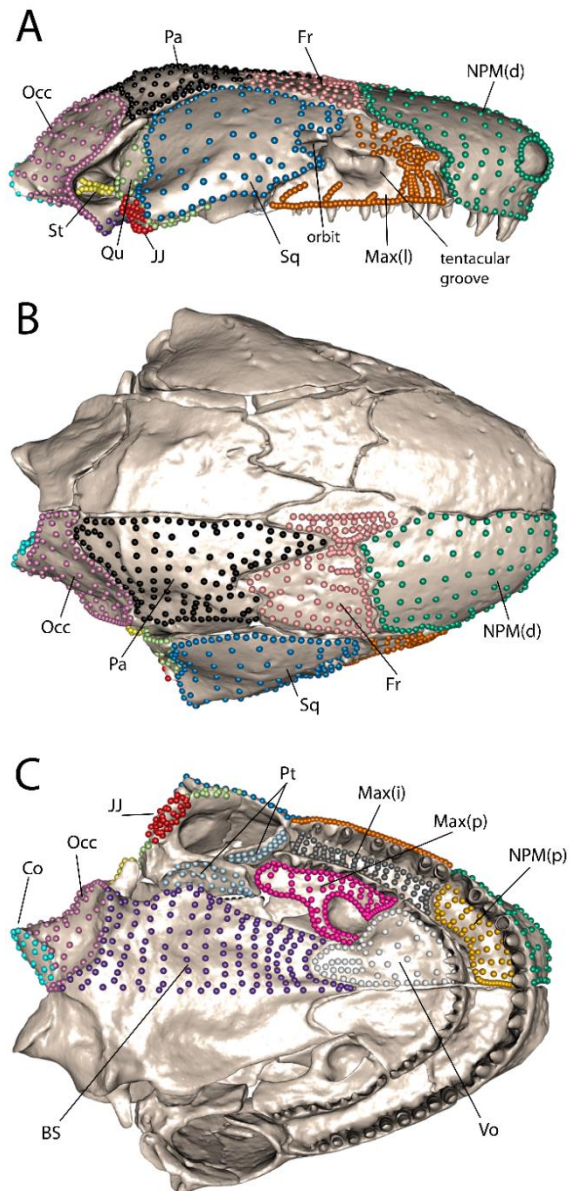

**Figure S1.** Landmarks and semilandmarks in (A) lateral, (B) dorsal and (C) ventral views, colour coded by the 16 cranial regions defined in our study, shown on *Siphonops annulatus*. Regions are as follows: **NPM(d) (green)**: nasal, premaxilla (or nasopremaxilla) and septomaxilla when present, dorsal surface; **Fr (light pink)**: frontal, and mesethmoid when present; **Pa (black)**: parietal; **Sq (dark blue)**: squamosal, and postfrontal when present; **Max(l) (orange)**: maxillopalatine (lateral surface), and prefrontal when present; **Qu (light green)**: quadrate (lateral surface); **JJ (red)**: quadrate (jaw joint articulation); **Occ (light purple)**: occipital (otic) region of os basale (excluding occipital condyle); **Co (aqua)**: occipital condyle; **BS (purple)**: Ventral surface of os basale; **NPM(p) (gold)**: palatal surface of nasopremaxilla, or the anterior projection of the vomer; **Vo (white)**: vomer; **Max(i) (grey)**: interdental plate of maxillopalatine; **Max(p) (hot pink)**: palatine shelf (maxillary plate) of maxillopalatine; **Pt (light blue)**: pterygoid, and/or pterygoid process of quadrate; **St (yellow)**: stapes.

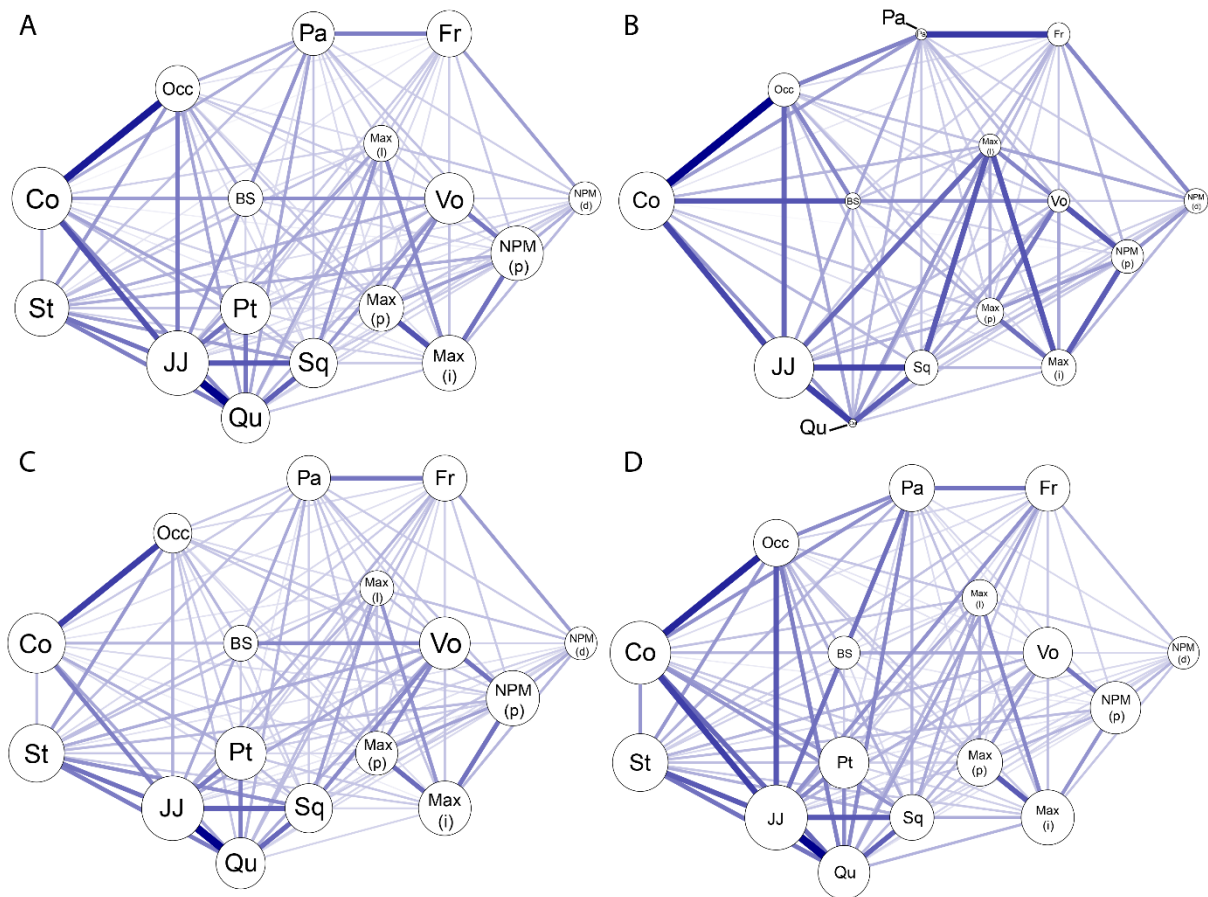

**Figure S2.** Network graphs displaying results from EMMLi analyses using (A) 10% subsampled, (B) anatomical landmarks only, (C) allometry-corrected, and (D) phylogenetically-corrected data. Layout approximately corresponds to a skull in lateral view, with the anterior to the right. Circle size is proportional to within-module trait correlation ( $\rho$ ), and line thickness is proportional to between-module trait correlation. The stapes and pterygoid are missing from the landmark-only graph, as these are not represented by any anatomical landmarks (semilandmarks only). For abbreviations see Figure S1.

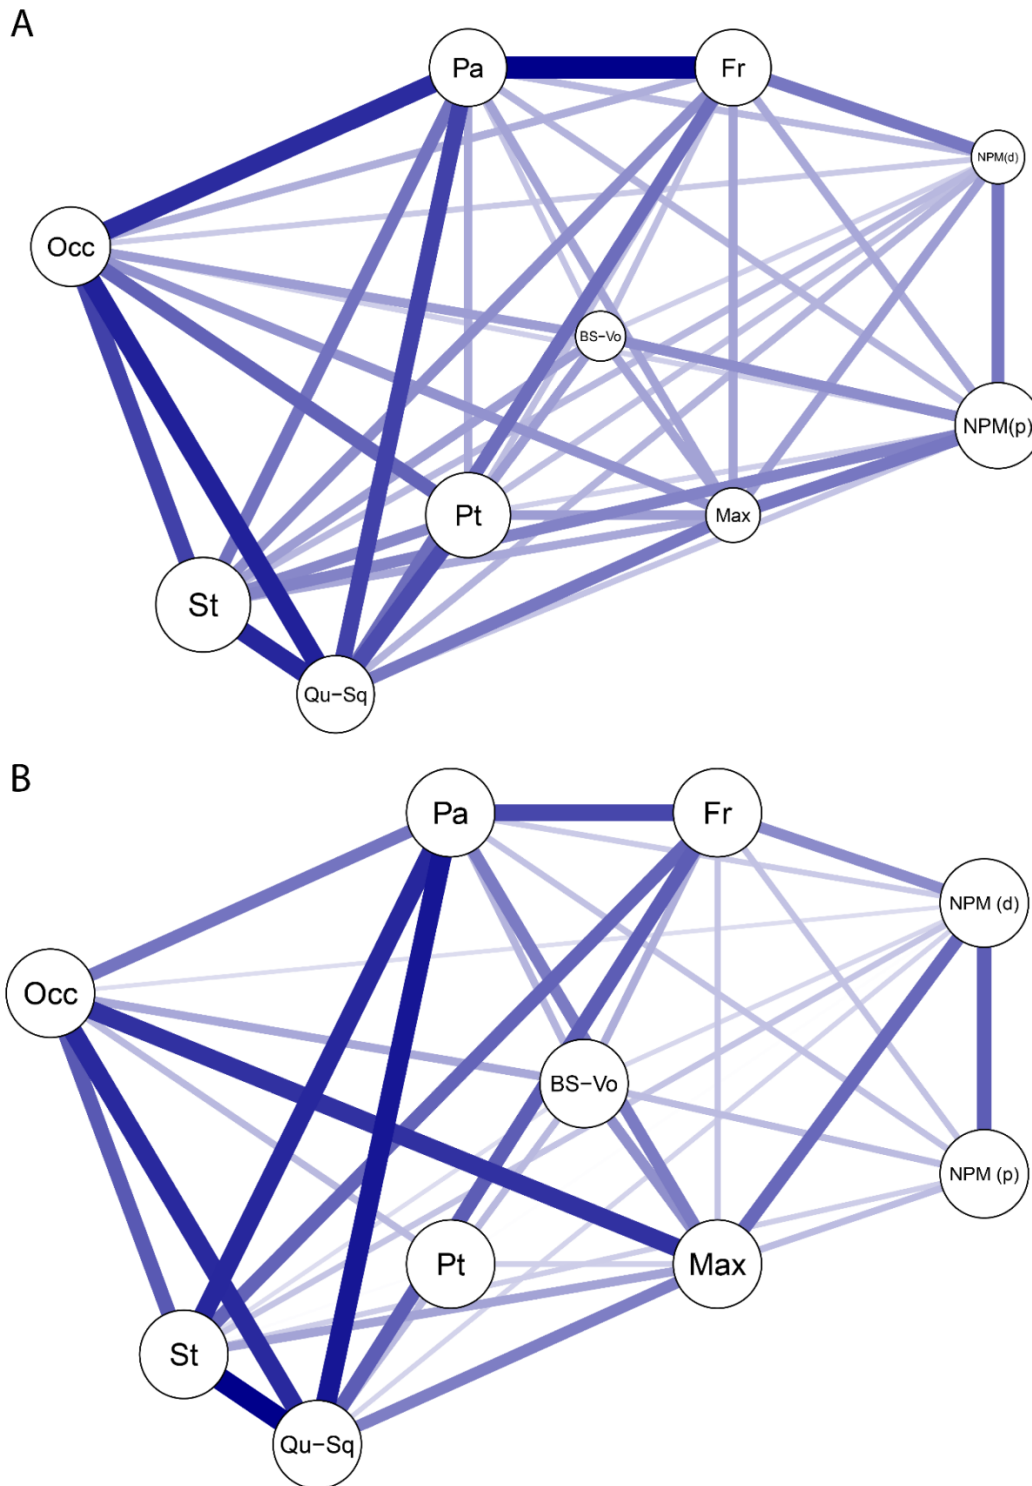

**Figure S3.** (A) Network graph from EMMLi analysis of the ten-module model, using phylogenetically-corrected data (see Fig.1 for module definitions). Layout approximately corresponds to a skull in lateral view, with the anterior to the right. Circle size is proportional to within-module trait correlation ( $\rho$ ), and line thickness is proportional to between-module trait correlation. (B) Network graph from Covariance Ratio analysis of the ten-module model, using phylogenetically-corrected data. Line thickness is an indicator of strength of covariation (but is not proportional, as values above 0.5 are cut off for ease of visualisation).

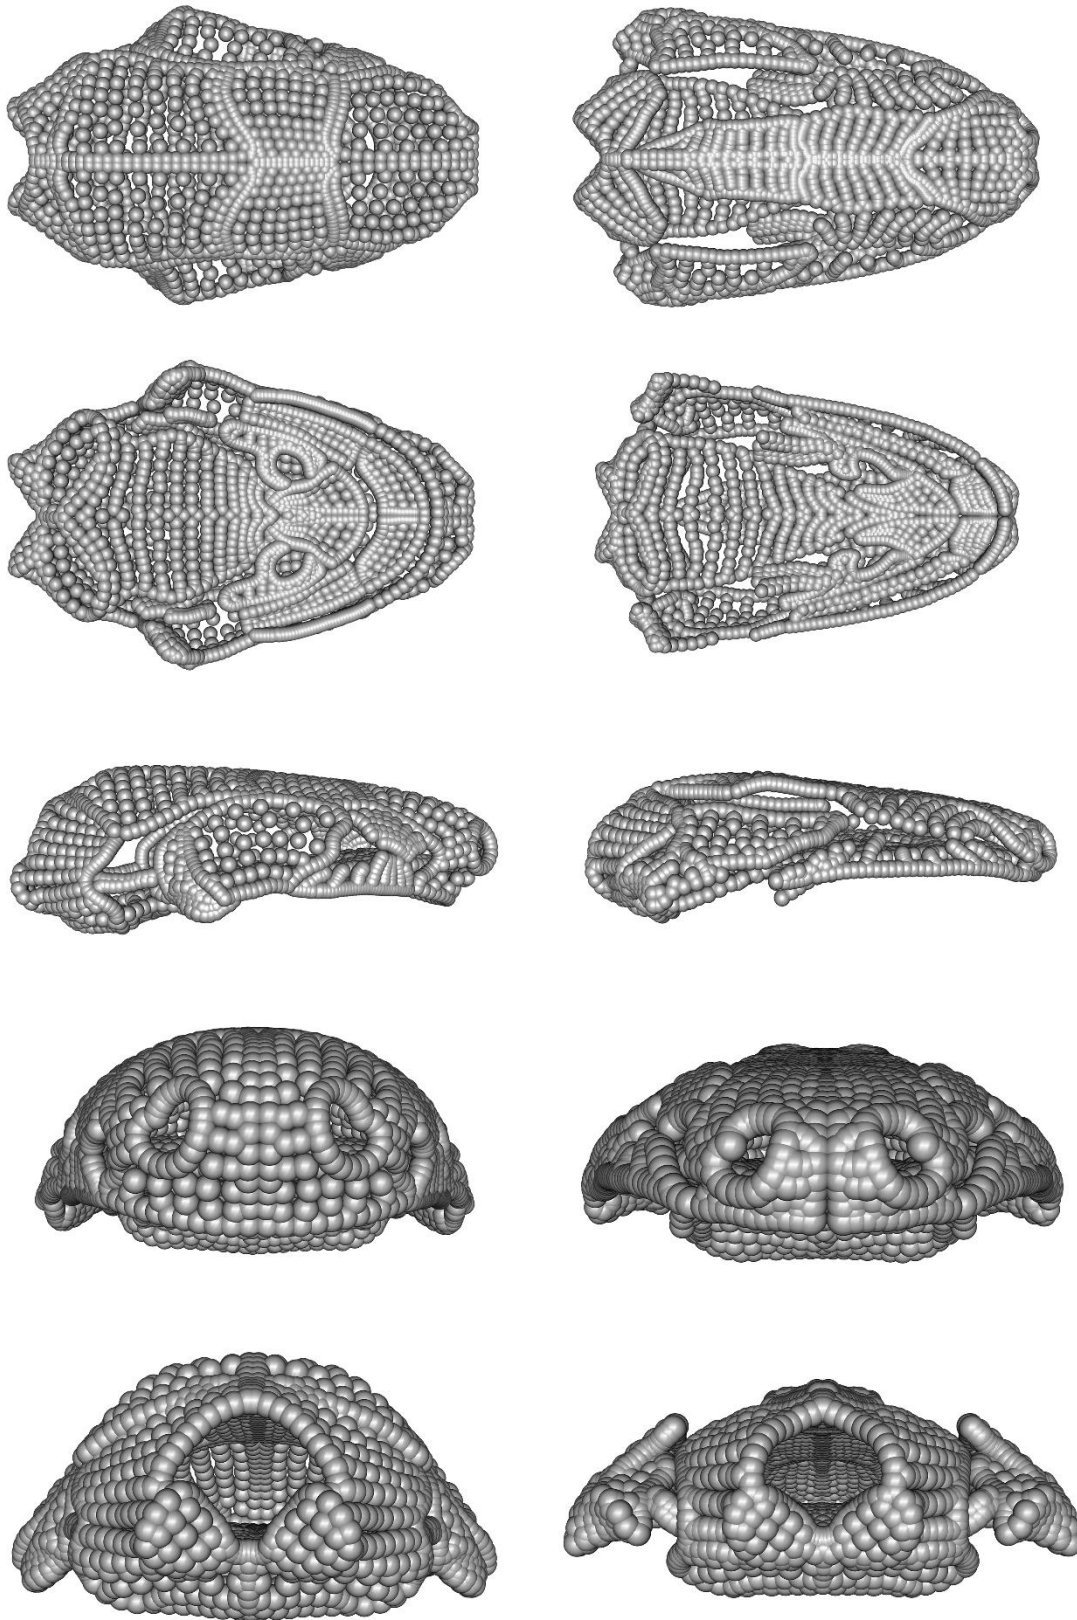

**Figure S4.** Reconstructed morphologies represented by positive (left) and negative (right) ends of PC1, in dorsal, ventral, lateral, anterior, and posterior views from top to bottom.

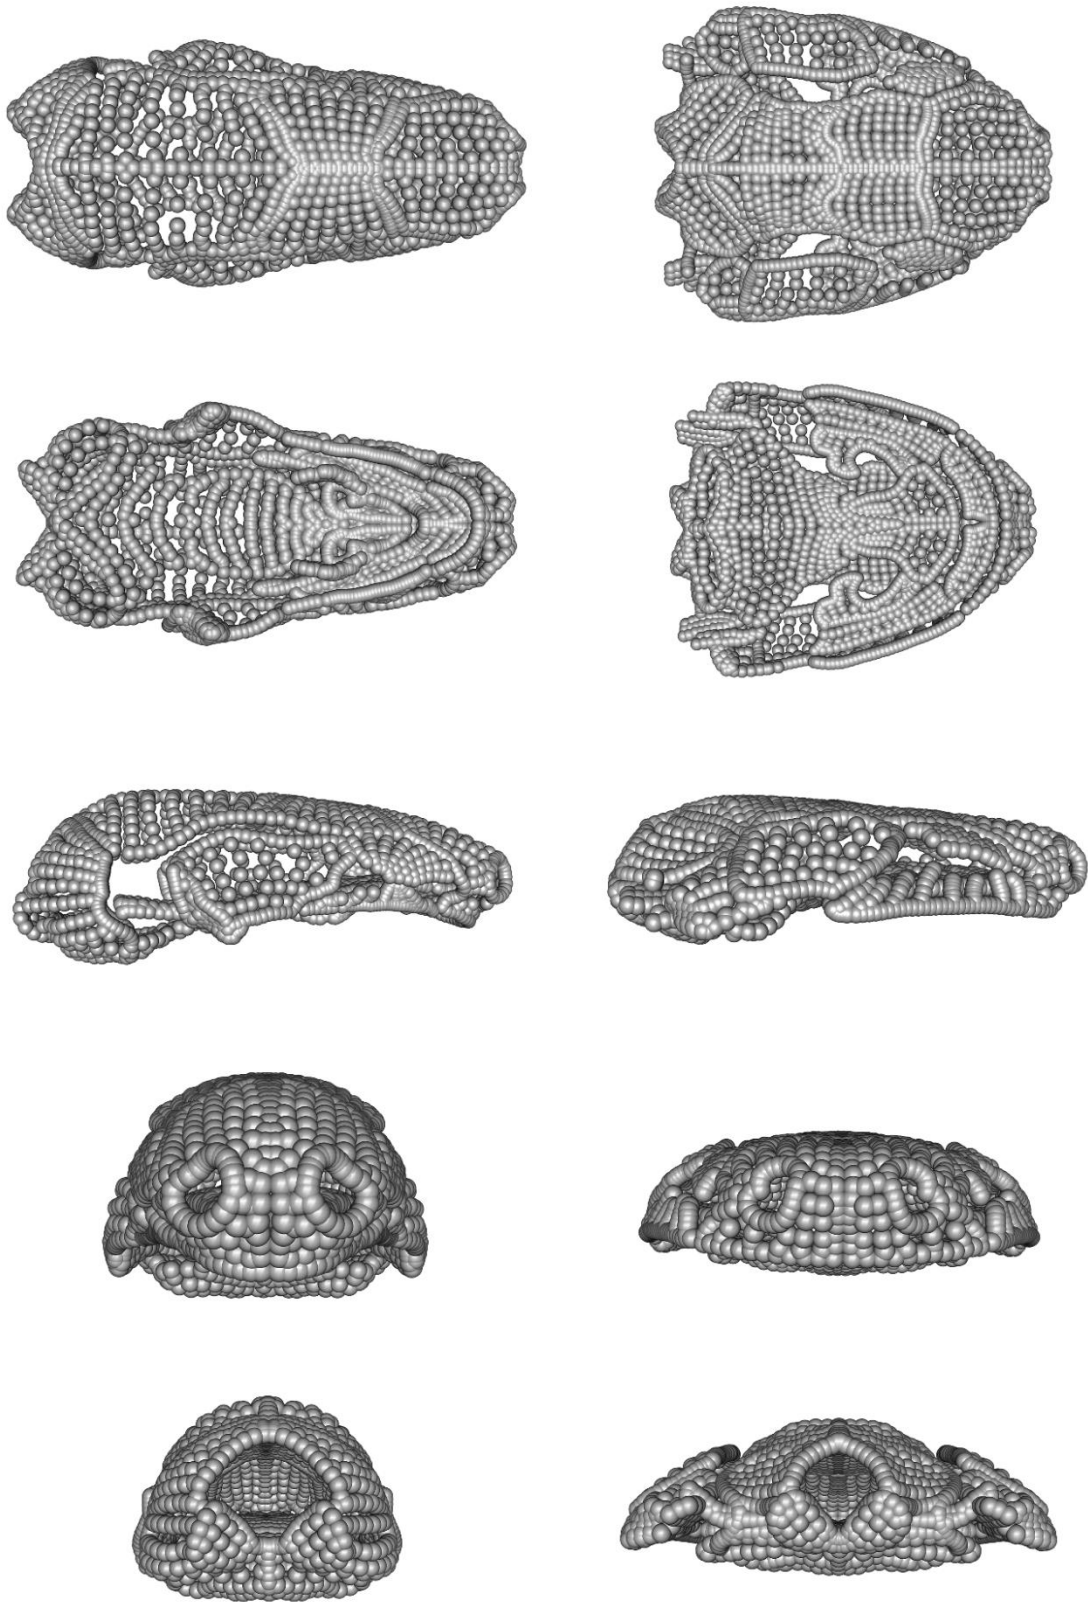

**Figure S5.** Reconstructed morphologies represented by positive (left) and negative (right) ends of PC2, in dorsal, ventral, lateral, anterior, and posterior views from top to bottom.

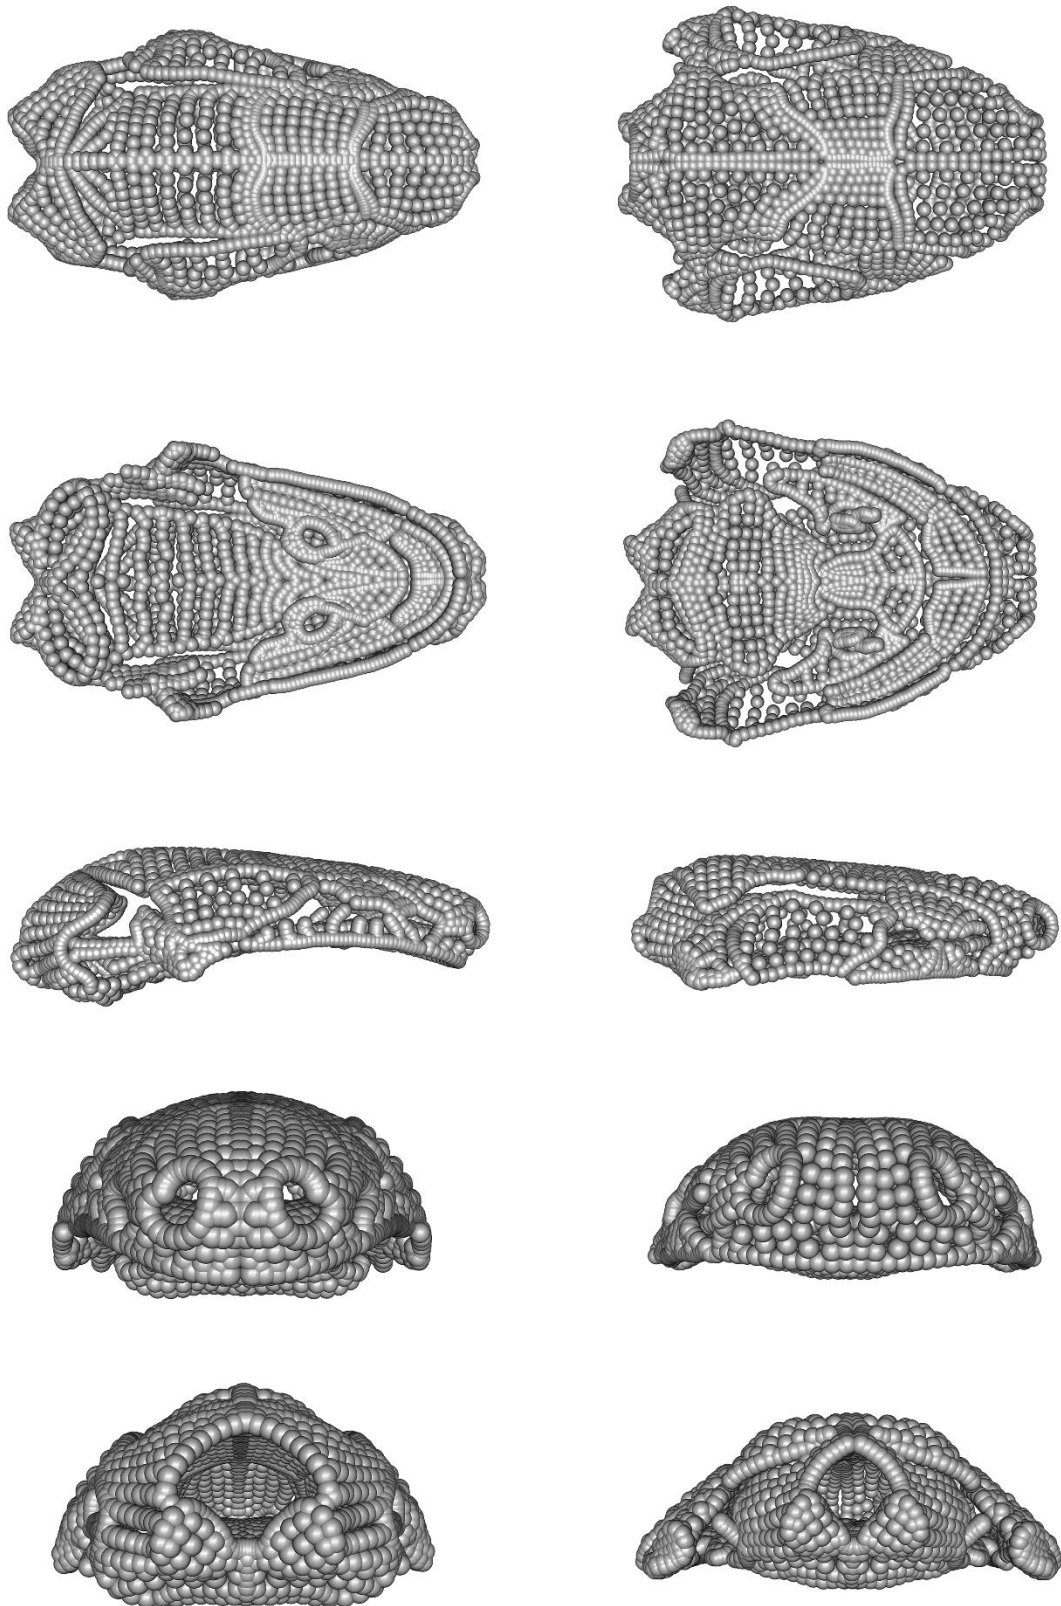

**Figure S6.** Reconstructed morphologies represented by positive (left) and negative (right) ends of PC3, in dorsal, ventral, lateral, anterior, and posterior views from top to bottom.

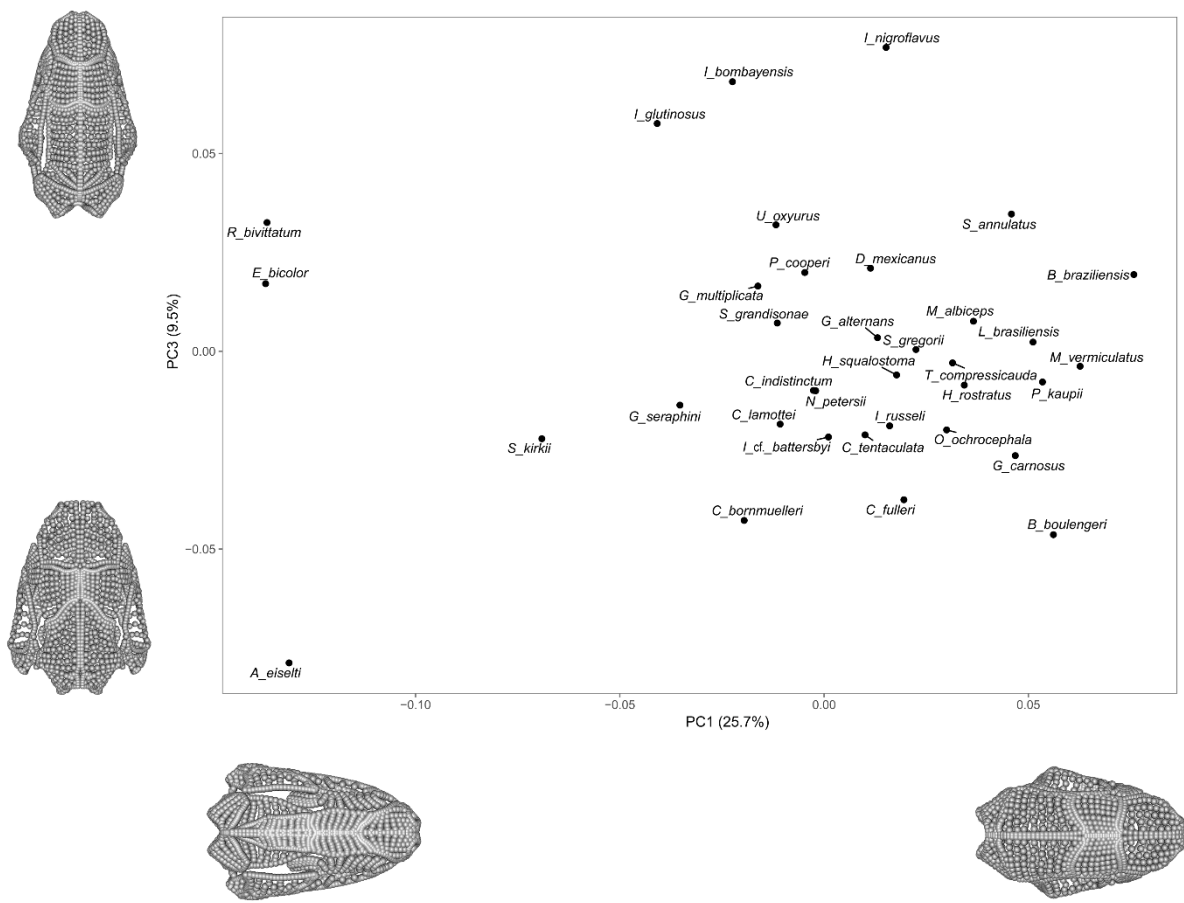

**Figure S7.** Morphospace of all 35 specimens based on the complete landmark and semilandmark dataset, with PC1 on the x-axis and PC3 on the y-axis. Shapes represented by the positive and negative end of each axis are displayed in dorsal view.



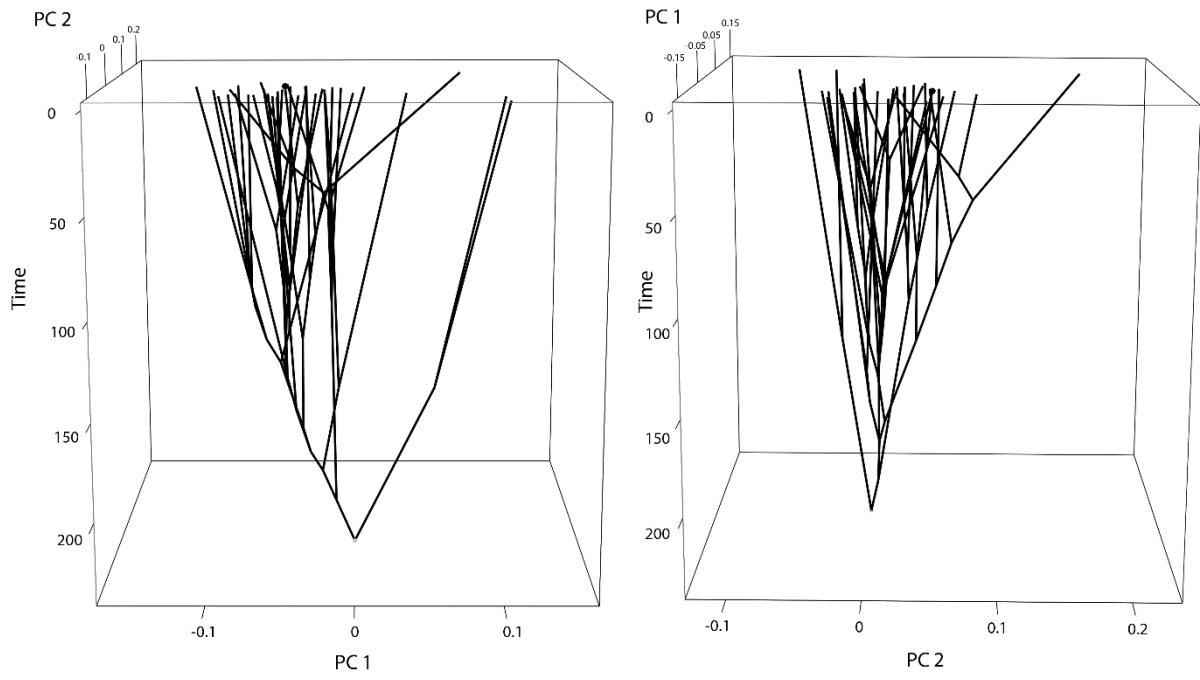

**Figure S8.** Phylomorphospace of all specimens in this study, with time in millions of years on the vertical axis (present day at the top).

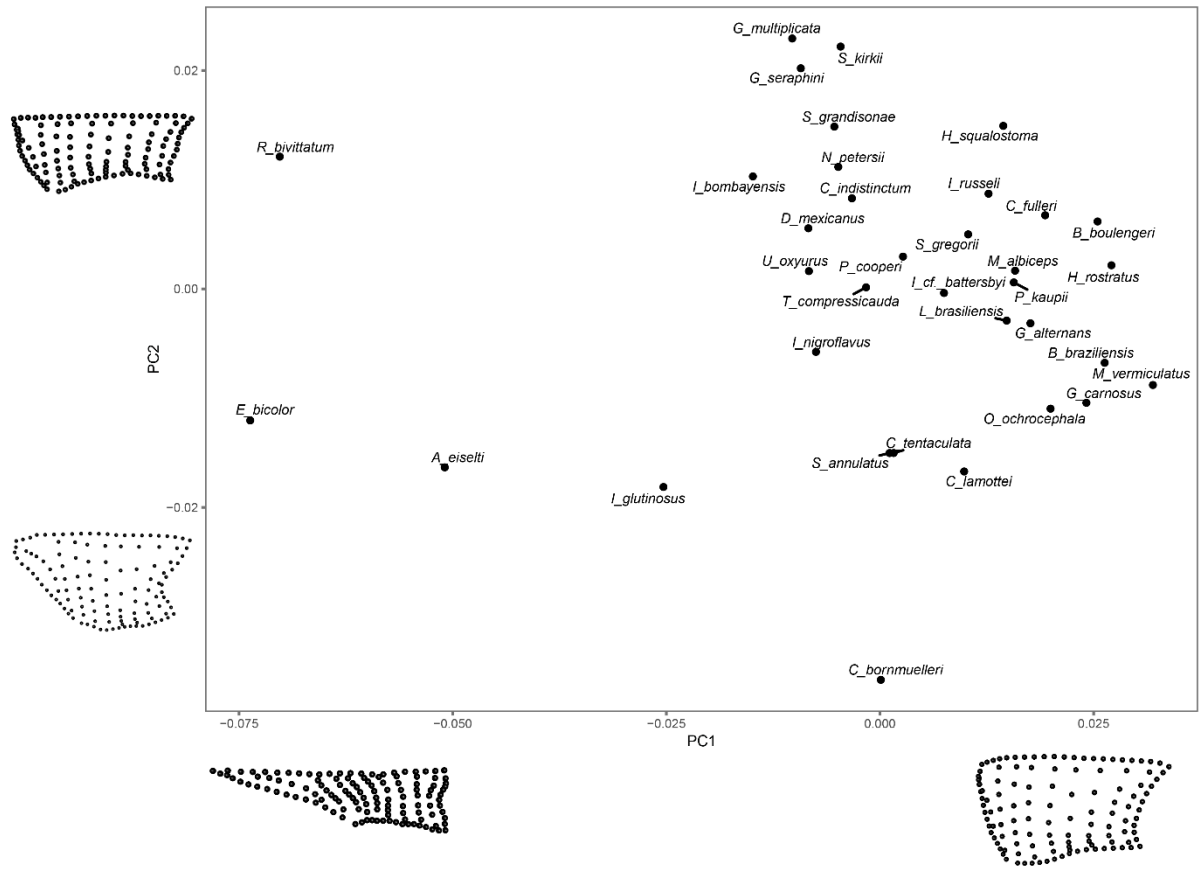

**Figure S9.** Morphospace of the parietal module for all specimens. This morphospace was generated from a PCA of this individual module, so axes may not align with those of the entire dataset. Shapes representing the positive and negative extremes along PC1 and PC2 are displayed in dorsal view (with anterior to the right).

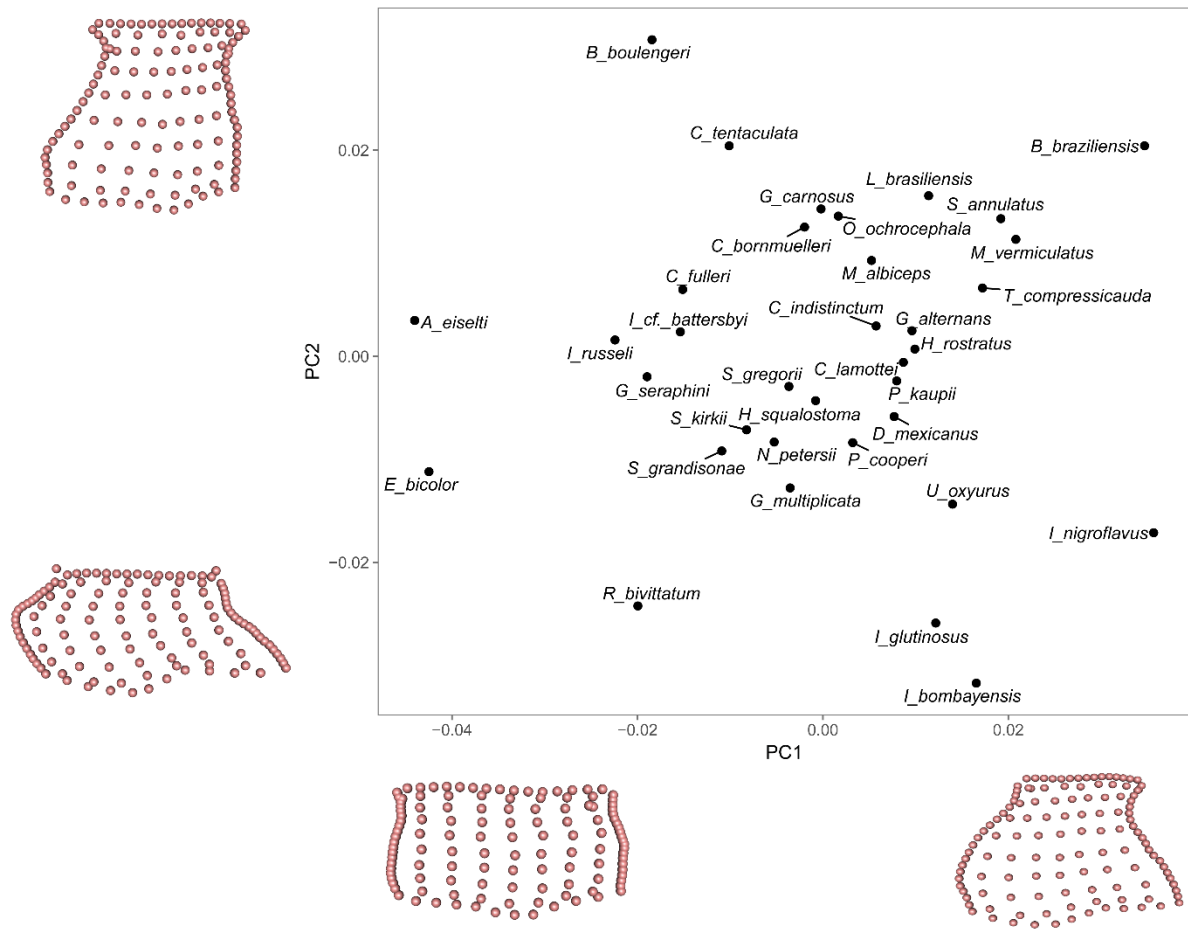

**Figure S10.** Morphospace of the frontal module for all specimens. This morphospace was generated from a PCA of this individual module, so axes may not align with those of the entire dataset. Shapes representing the positive and negative extremes along PC1 and PC2 are displayed in dorsal view (with anterior to the right).

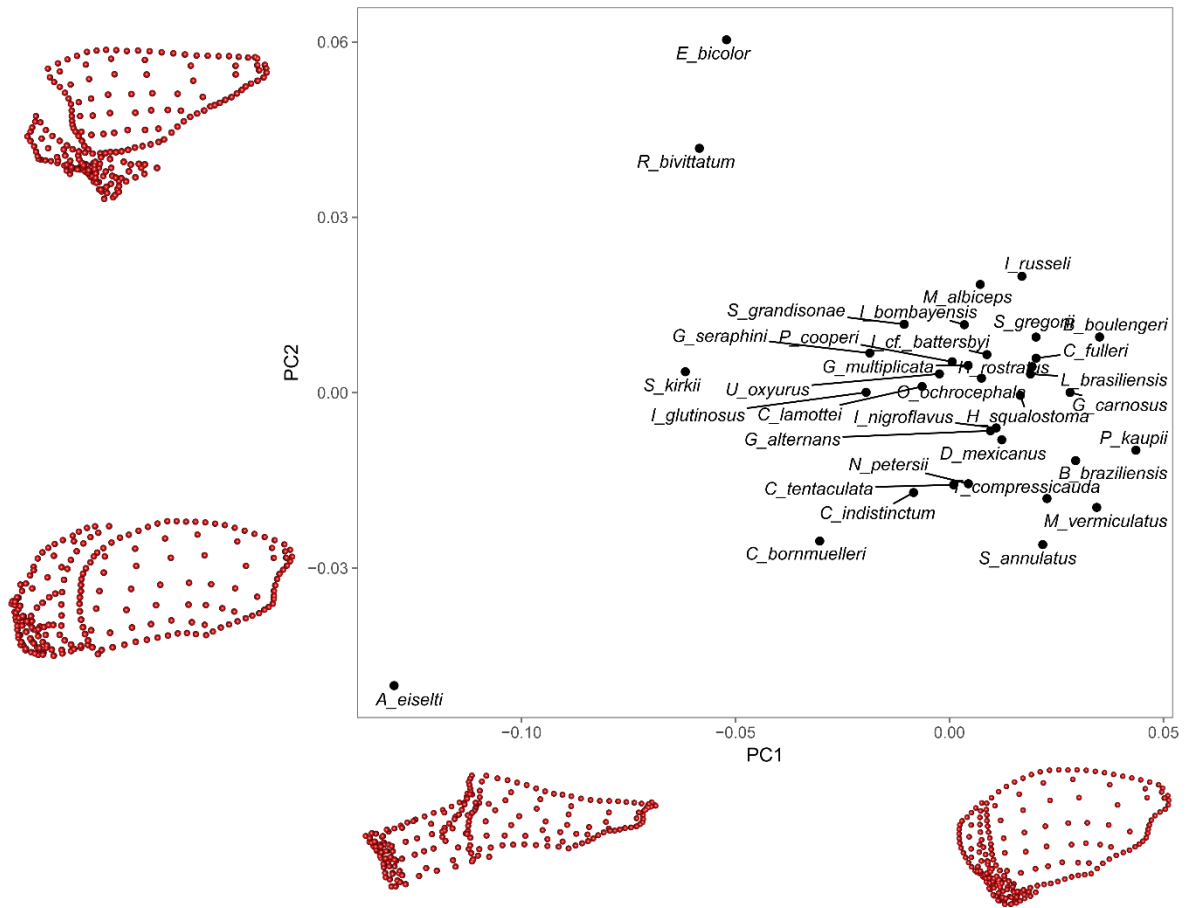

**Figure S11.** Morphospace of the quadrate-squamosal module for all specimens. This morphospace was generated from a PCA of this individual module, so axes may not align with those of the entire dataset. Shapes representing the positive and negative extremes along PC1 and PC2 are displayed in lateral view (with anterior to the right).

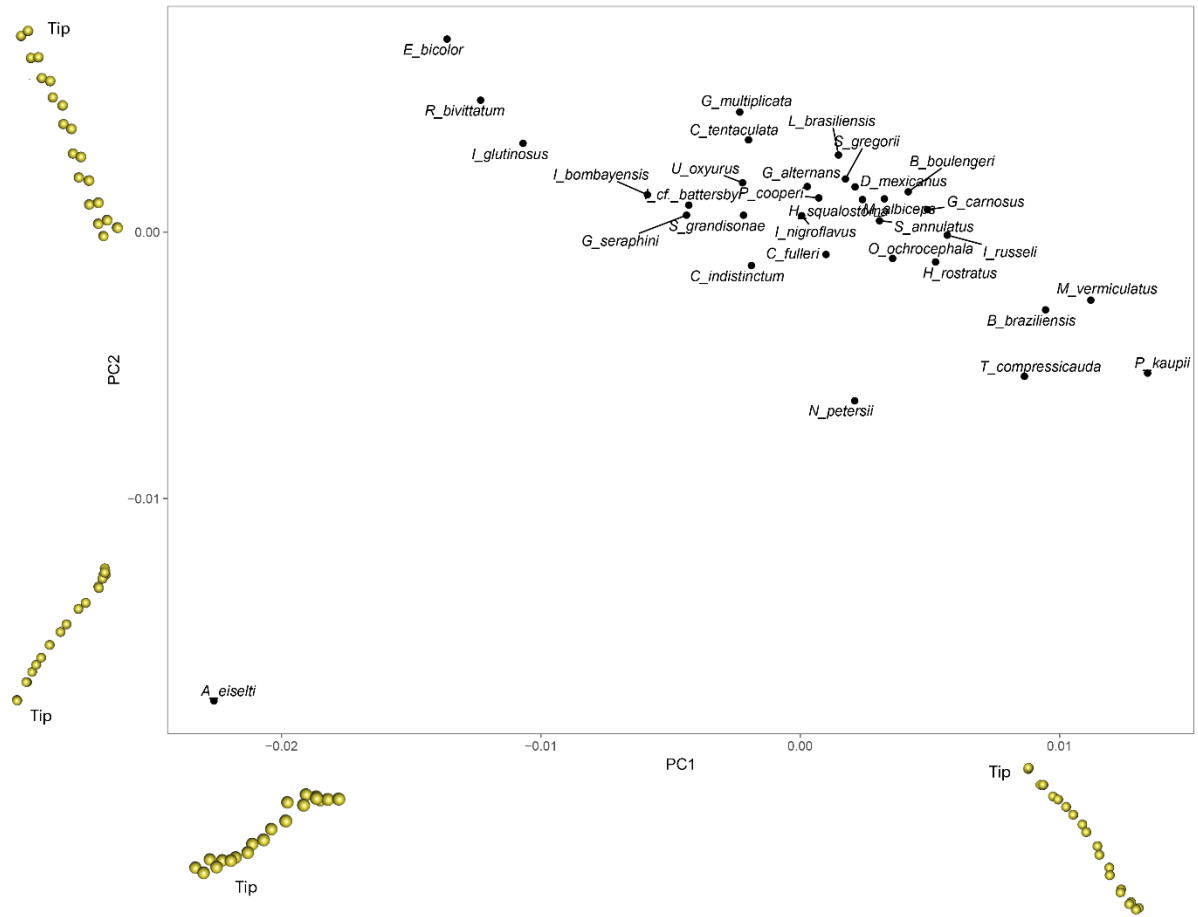

**Figure S12.** Morphospace of the stapes module for all specimens. This morphospace was generated from a PCA of this individual module, so axes may not align with those of the entire dataset. Shapes representing the positive and negative extremes along PC1 and PC2 are displayed in ventral view (with lateral to the left). ‘Tip’ refers to position of the lateral tip of the stapes.

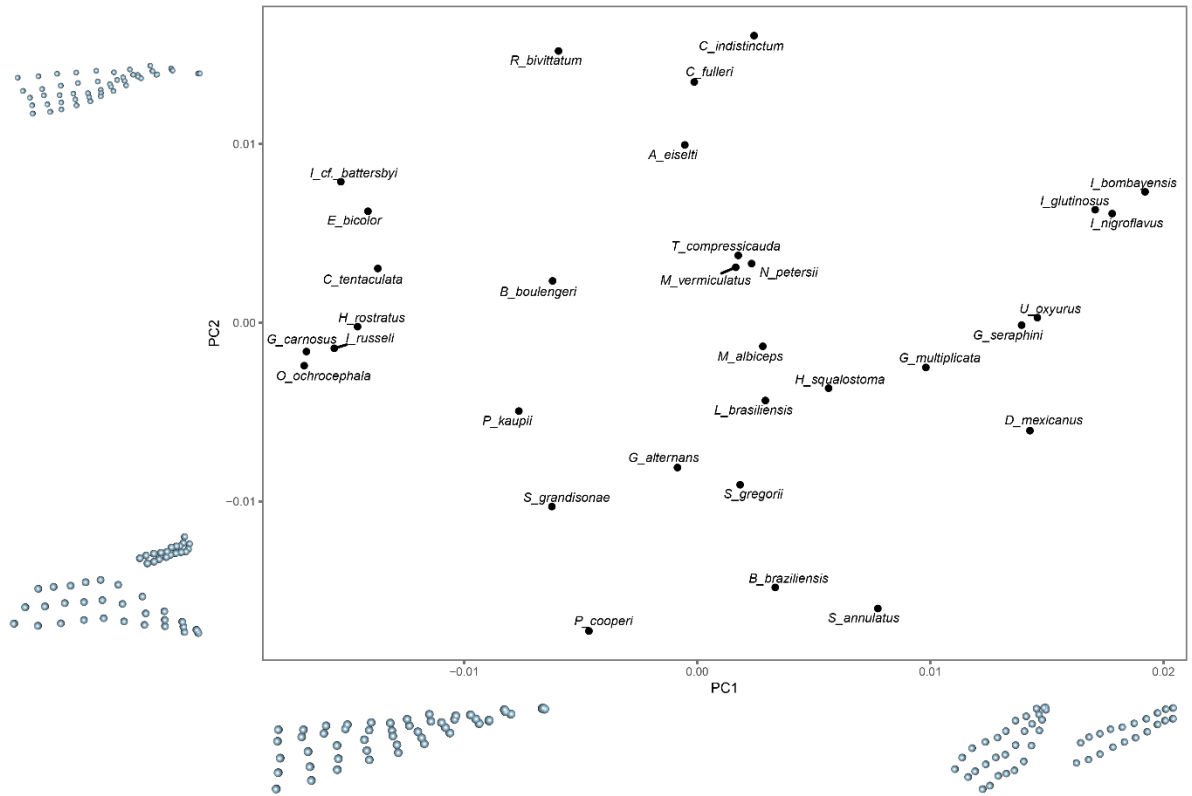

**Figure S13.** Morphospace of the pterygoid module for all specimens. This morphospace was generated from a PCA of this individual module, so axes may not align with those of the entire dataset. Shapes representing the positive and negative extremes along PC1 and PC2 are displayed in ventral view (with anterior to the right).

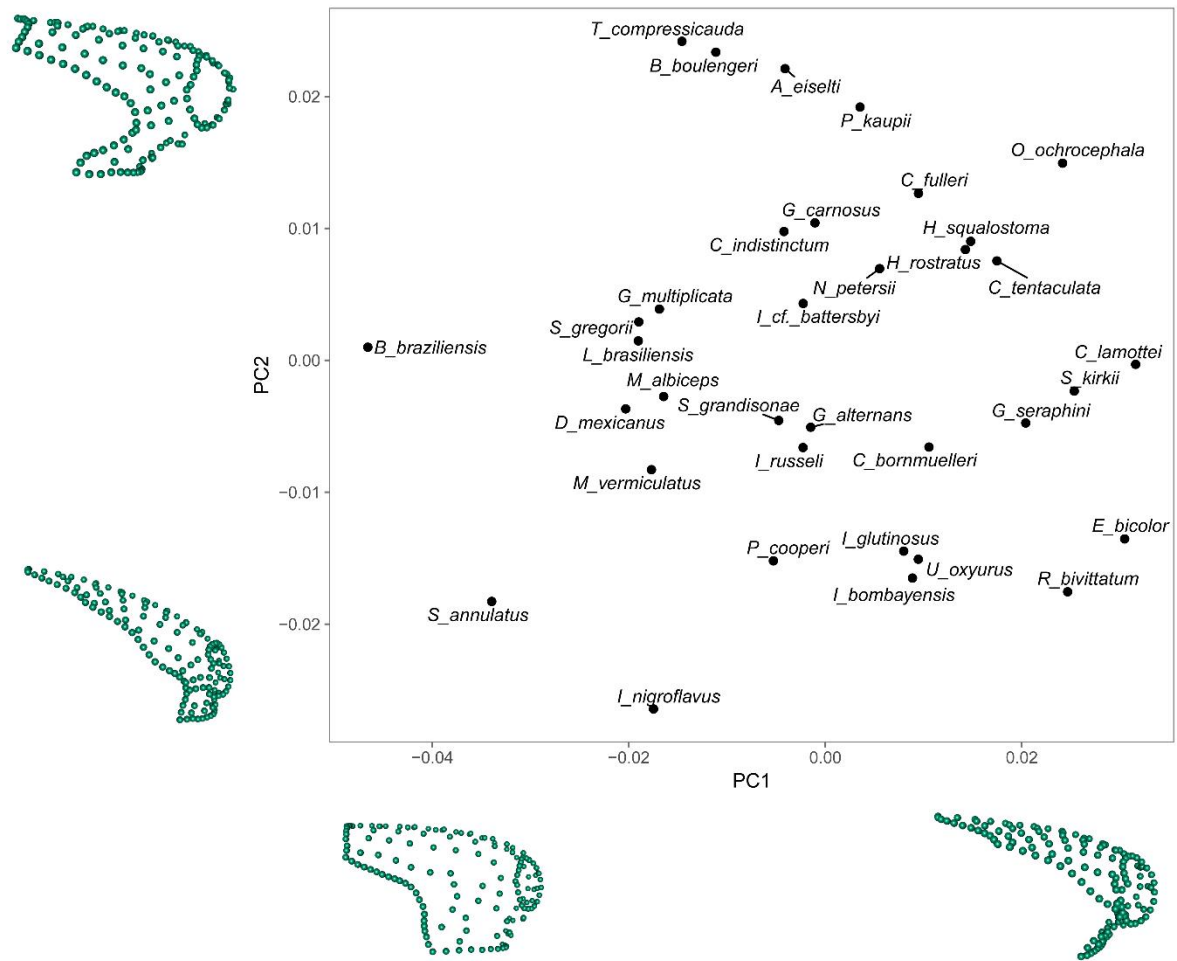

**Figure S14.** Morphospace of the nasopremaxilla (dorsal) module for all specimens. This morphospace was generated from a PCA of this individual module, so axes may not align with those of the entire dataset. Shapes representing the positive and negative extremes along PC1 and PC2 are displayed in lateral view (with anterior to the right).

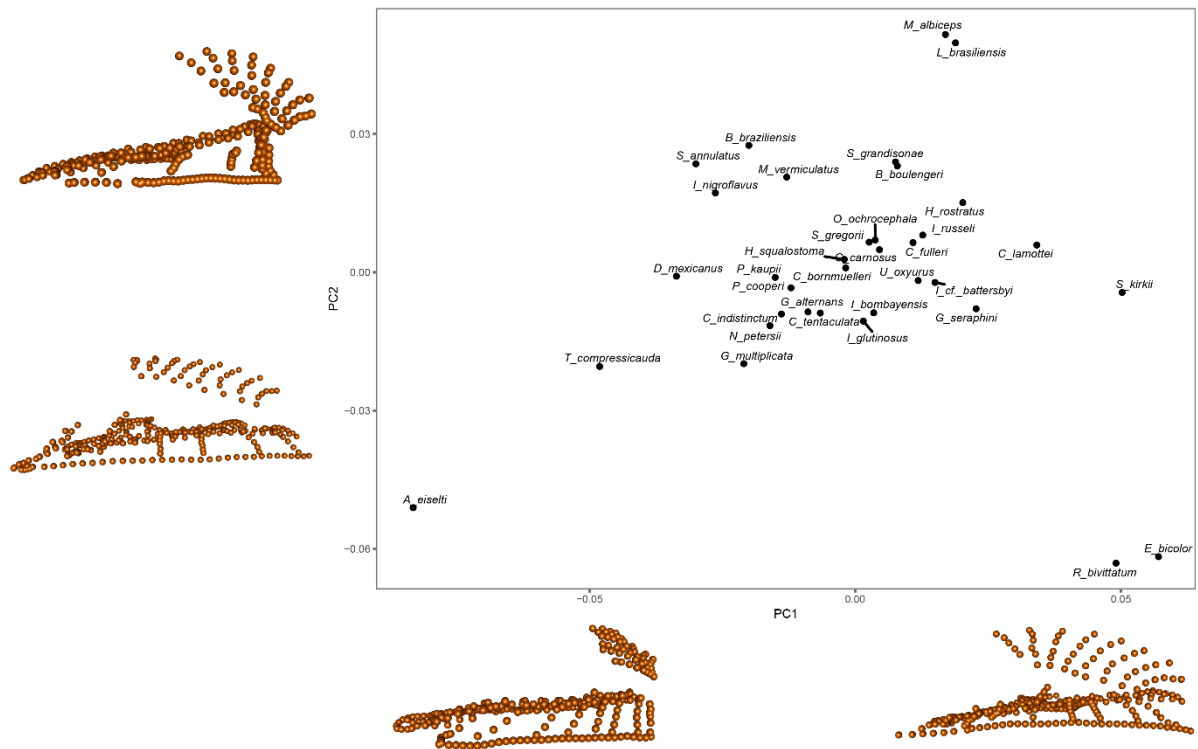

**Figure S15.** Morphospace of the maxillopalatine module for all specimens. This morphospace was generated from a PCA of this individual module, so axes may not align with those of the entire dataset. Shapes representing the positive and negative extremes along PC1 and PC2 are displayed in lateral view (with anterior to the right).



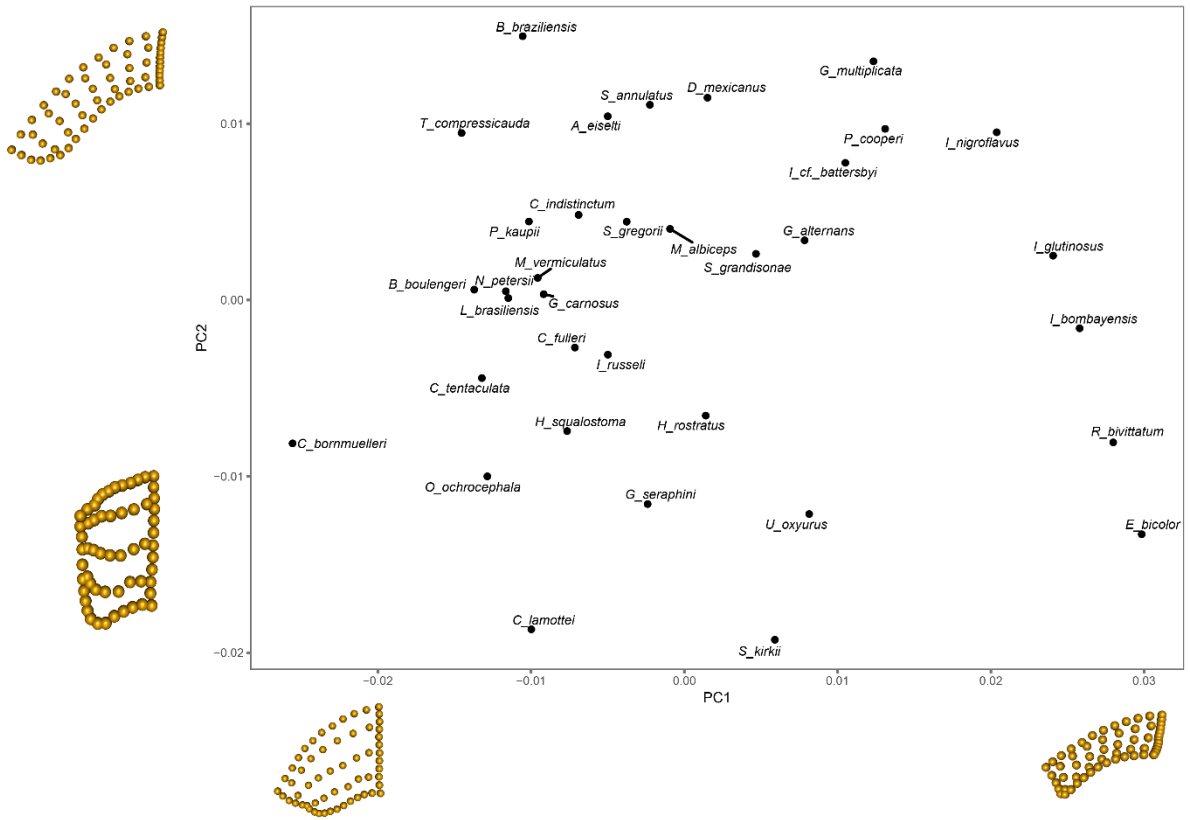

**Figure S16.** Morphospace of the nasopremaxilla (palatal) module for all specimens. This morphospace was generated from a PCA of this individual module, so axes may not align with those of the entire dataset. Shapes representing the positive and negative extremes along PC1 and PC2 are displayed in ventral view (with medial to the right).

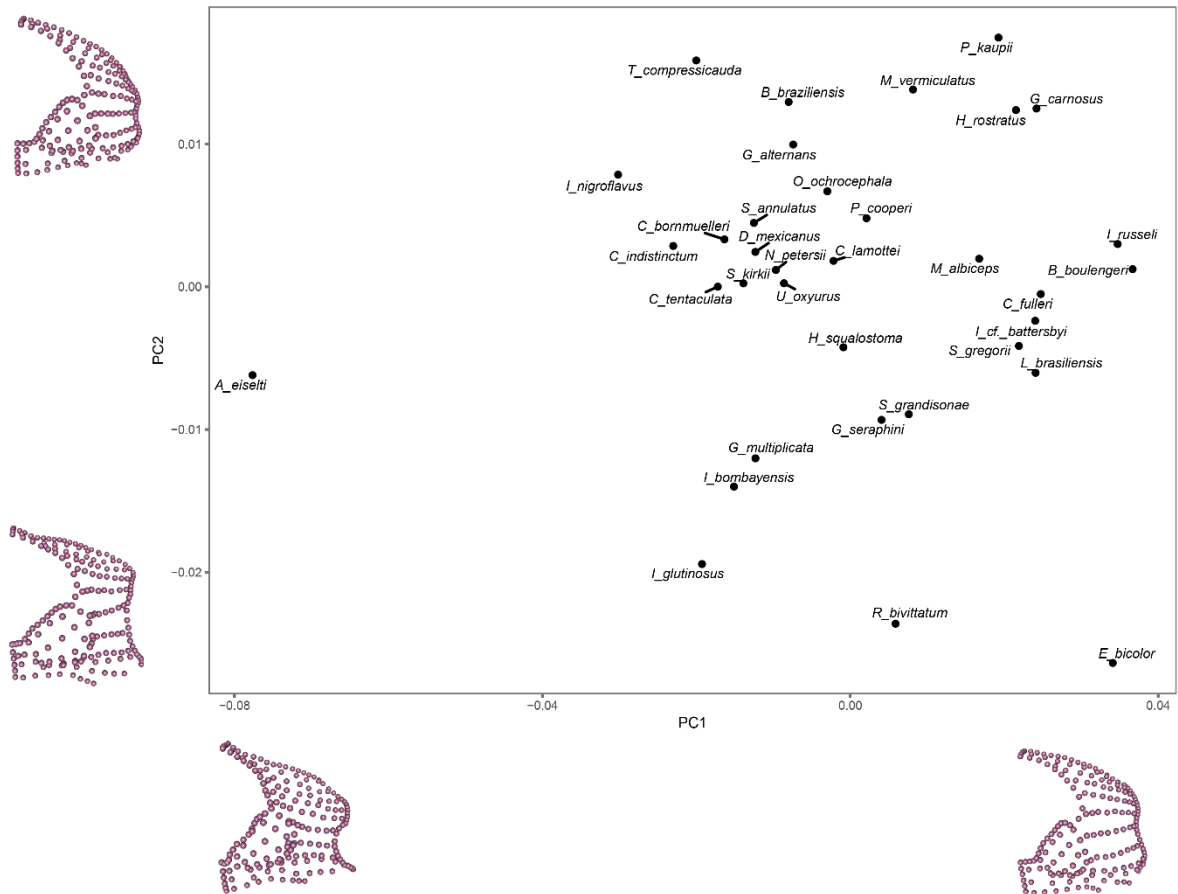

**Figure S17.** Morphospace of the occipital module for all specimens. This morphospace was generated from a PCA of this individual module, so axes may not align with those of the entire dataset. Shapes representing the positive and negative extremes along PC1 and PC2 are displayed in posterior view (with lateral to the right).

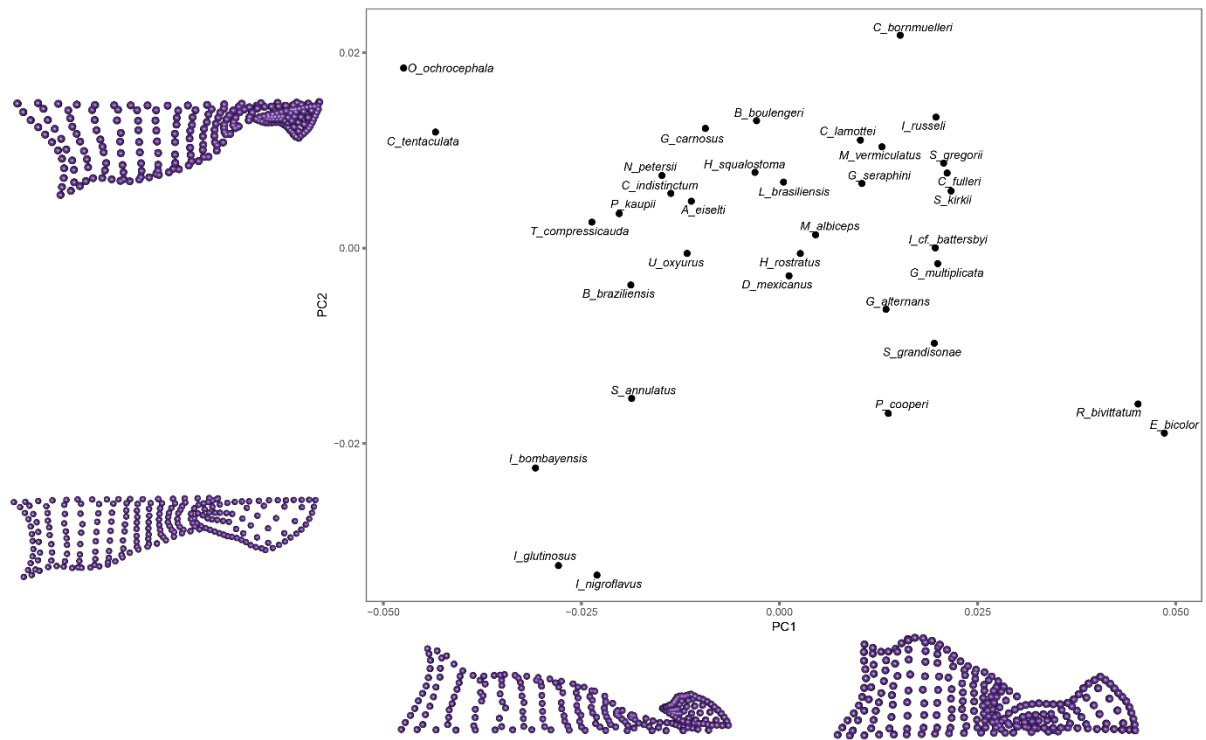

**Figure S18.** Morphospace of the ventral os basale-vomer module for all specimens. This morphospace was generated from a PCA of this individual module, so axes may not align with those of the entire dataset. Shapes representing the positive and negative extremes along PC1 and PC2 are displayed in ventral view (with anterior to the right).

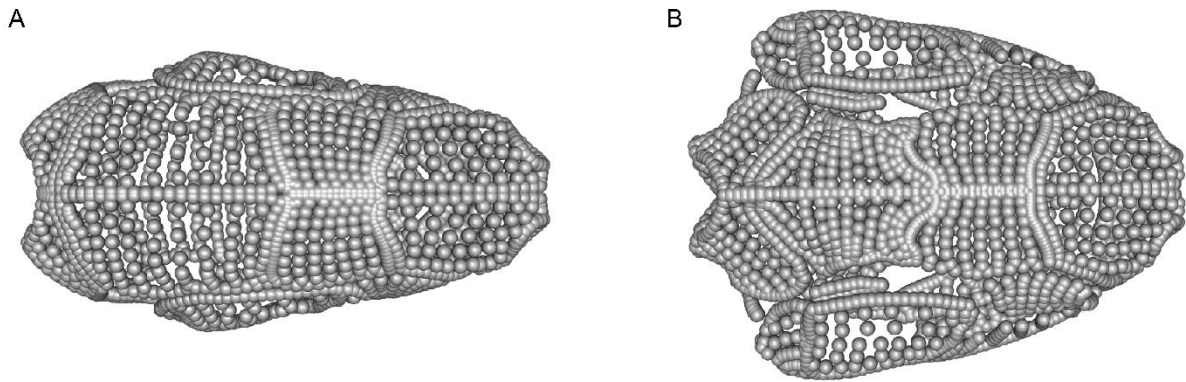

**Figure S19.** Whole cranial morphology at (A) minimum and (B) maximum size.

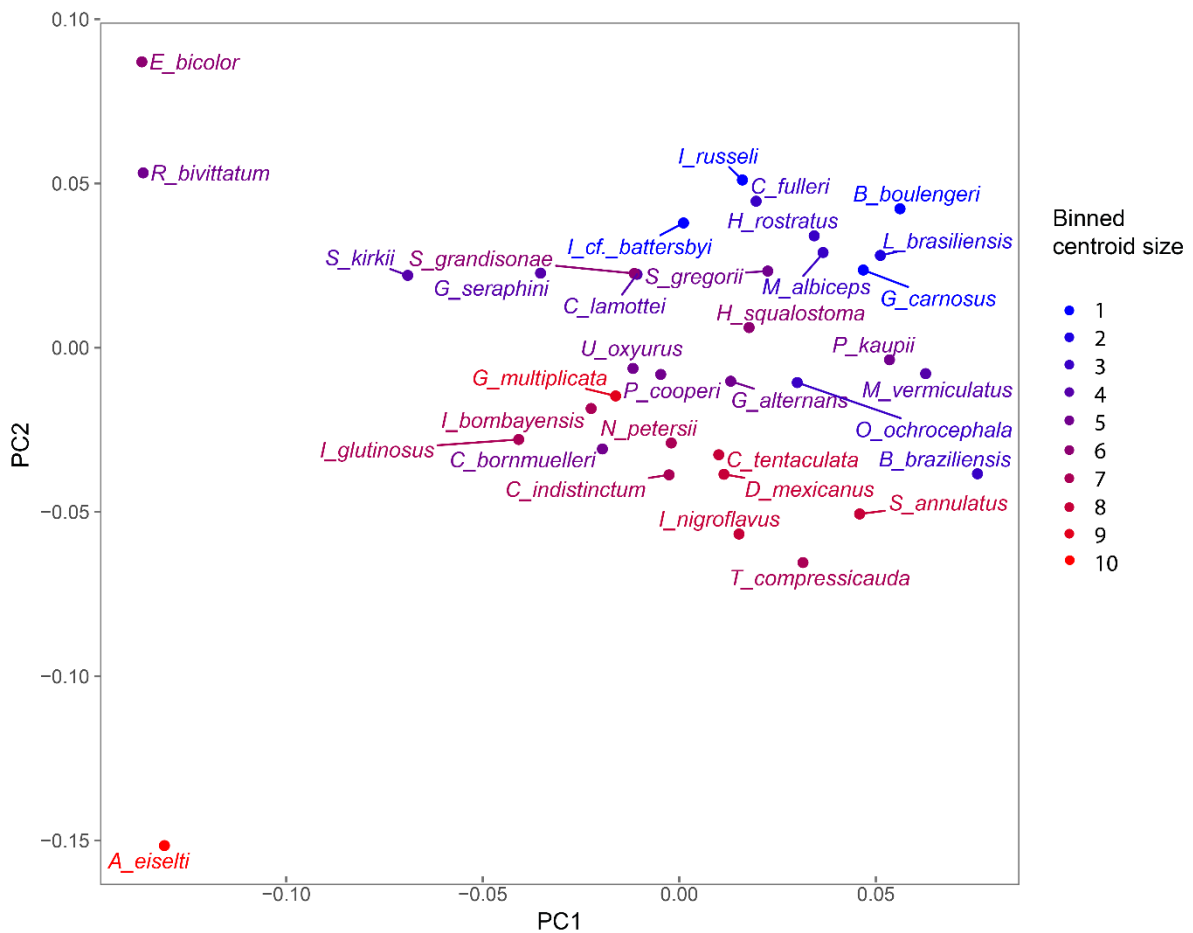

**Figure S20.** Distribution of specimens in morphospace, colour-coded by centroid size, binned into 10 bins of equal size.

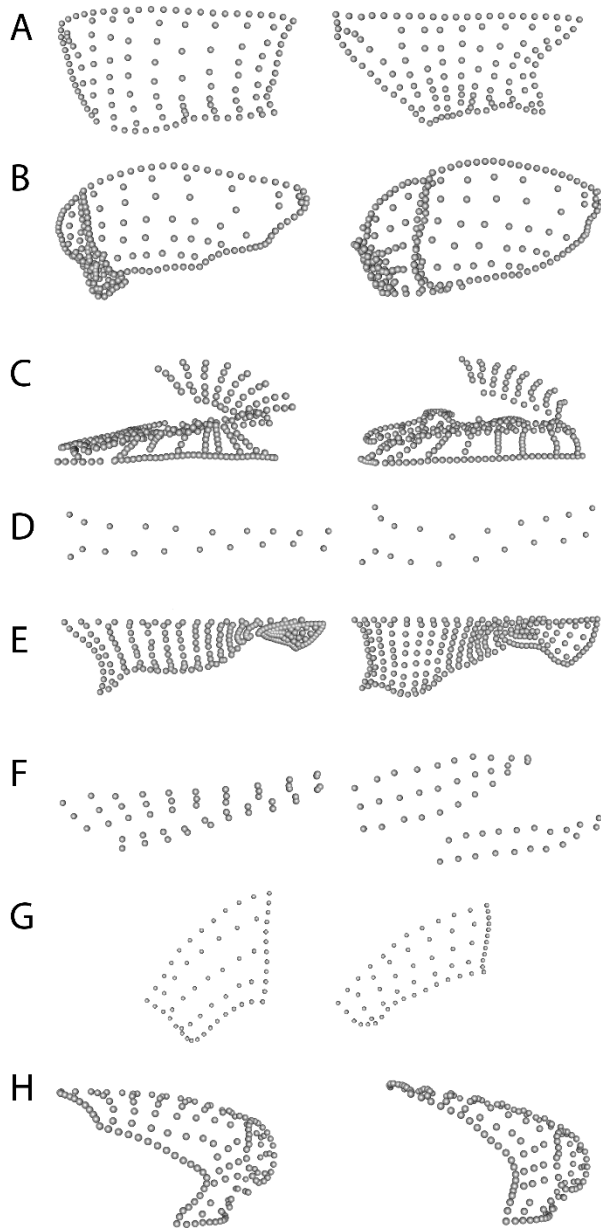

**Figure S21.** Module morphologies at minimum (left) and maximum (right) size. Allometry was investigated using global Procrustes alignment. The occipital module was the most influenced by allometry and can be seen in Figure S22. Remaining modules are in descending order of strength of allometry: (A) Parietal, (B) Quadrate-squamosal, (C) Maxillopalatine, (D) Stapes, (E) Ventral os basale-vomer, (F) Pterygoid, (G) Nasopremaxilla (palatal surface), (H) Nasopremaxilla (dorsal surface). The frontal module is excluded because it did not display significant allometric signal.

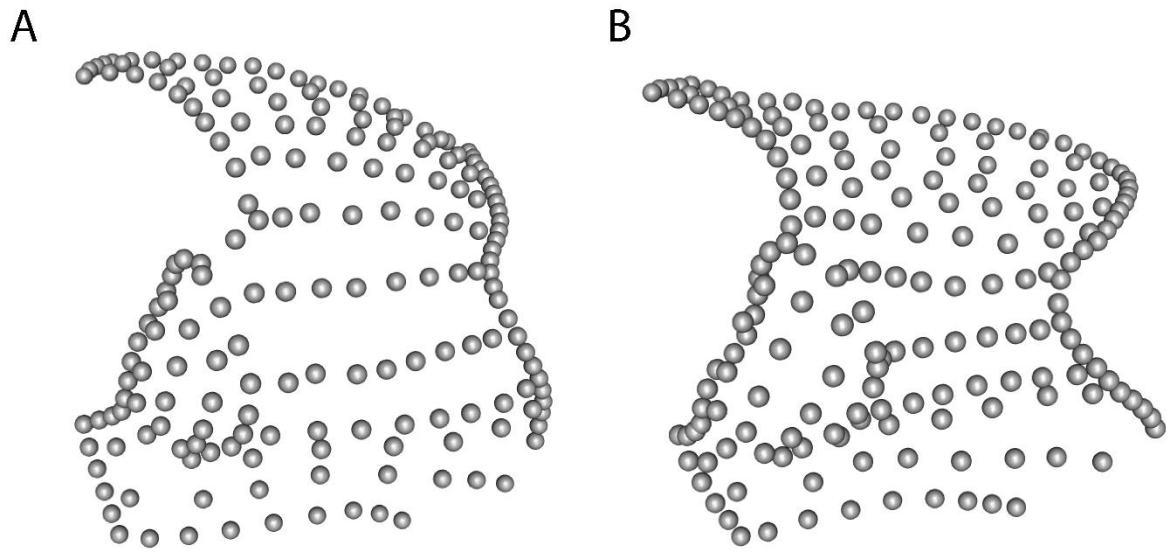

**Figure S22.** The occipital module morphology (posterior view), at (A) minimum and (B) maximum size. Note the ‘bulging’ of this module dorsally at minimum size, in the position of the otic capsule, suggesting smaller species have relatively larger otic capsules.

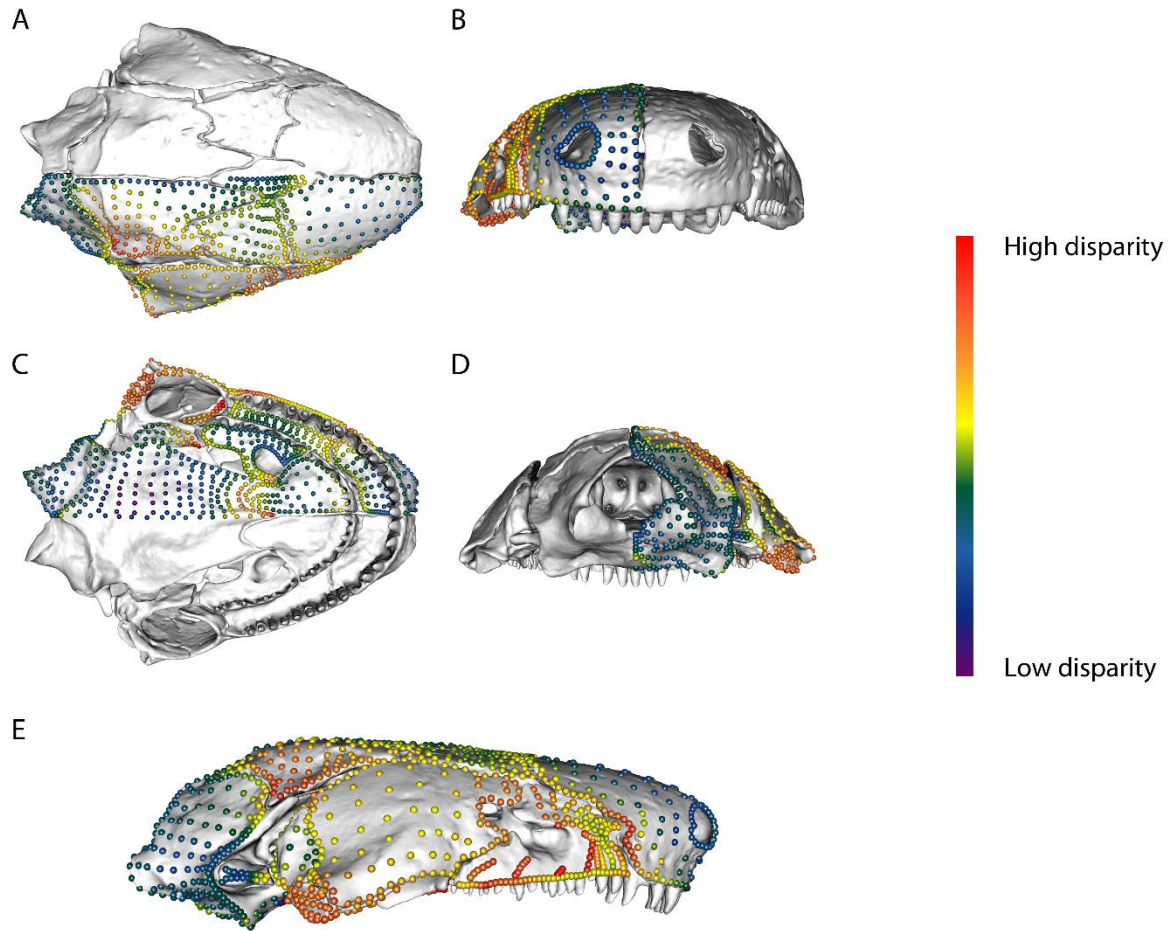

**Figure S23.** Landmarks and semilandmarks displayed on *Siphonops annulatus* and colour coded by magnitude of disparity, measured as Procrustes variance, from low (purple) to high (red), in (A) dorsal, (B) anterior, (C) ventral, (D) posterior, and (E) lateral aspect.

**Table S1.** Results of EMMLi analysis for trait correlations ( $\rho$ ) within and between 16 cranial regions.

|                               | Frontal | Parietal | Nasopremaxilla (dorsal) | Maxillopalatine (lateral) | Os basale (occipital) | Occipital condyle | Quadrate (jaw joint) | Squamosal | Quadrate (lateral) | Os basale (ventral) | Nasopremaxilla (palatal) | Vomer | Maxillopalatine (interdental plate) | Maxillopalatine (palatine shelf) | Pterygoid | Stapes |
|-------------------------------|---------|----------|-------------------------|---------------------------|-----------------------|-------------------|----------------------|-----------|--------------------|---------------------|--------------------------|-------|-------------------------------------|----------------------------------|-----------|--------|
| Frontal                       | 0.70    |          |                         |                           |                       |                   |                      |           |                    |                     |                          |       |                                     |                                  |           |        |
| Parietal                      | 0.39    | 0.67     |                         |                           |                       |                   |                      |           |                    |                     |                          |       |                                     |                                  |           |        |
| Nasopremaxilla (dorsal)       | 0.31    | 0.16     | 0.50                    |                           |                       |                   |                      |           |                    |                     |                          |       |                                     |                                  |           |        |
| Maxillopalatine (lateral)     | 0.17    | 0.17     | 0.20                    | 0.55                      |                       |                   |                      |           |                    |                     |                          |       |                                     |                                  |           |        |
| Os basale (occipital)         | 0.09    | 0.26     | 0.09                    | 0.12                      | 0.70                  |                   |                      |           |                    |                     |                          |       |                                     |                                  |           |        |
| Occipital condyle             | 0.04    | 0.27     | 0.08                    | 0.15                      | 0.72                  | 0.94              |                      |           |                    |                     |                          |       |                                     |                                  |           |        |
| Quadrate (jaw joint)          | 0.17    | 0.34     | 0.10                    | 0.28                      | 0.42                  | 0.54              | 0.97                 |           |                    |                     |                          |       |                                     |                                  |           |        |
| Squamosal                     | 0.12    | 0.20     | 0.11                    | 0.33                      | 0.12                  | 0.22              | 0.53                 | 0.74      |                    |                     |                          |       |                                     |                                  |           |        |
| Quadrate (lateral)            | 0.18    | 0.28     | 0.14                    | 0.26                      | 0.29                  | 0.37              | 0.81                 | 0.50      | 0.77               |                     |                          |       |                                     |                                  |           |        |
| Os basale (ventral)           | 0.15    | 0.12     | 0.10                    | 0.11                      | 0.29                  | 0.32              | 0.14                 | 0.13      | 0.14               | 0.54                |                          |       |                                     |                                  |           |        |
| Nasopremaxilla (palatal)      | 0.18    | 0.20     | 0.26                    | 0.20                      | 0.13                  | 0.06              | 0.10                 | 0.17      | 0.13               | 0.13                | 0.83                     |       |                                     |                                  |           |        |
| Vomer                         | 0.14    | 0.15     | 0.15                    | 0.18                      | 0.17                  | 0.12              | 0.23                 | 0.33      | 0.23               | 0.35                | 0.44                     | 0.77  |                                     |                                  |           |        |
| Maxillopalatine (interdental) | 0.16    | 0.15     | 0.23                    | 0.38                      | 0.12                  | 0.08              | 0.16                 | 0.16      | 0.18               | 0.11                | 0.45                     | 0.20  | 0.85                                |                                  |           |        |



|                                     |      |      |      |      |      |      |      |      |      |      |      |      |      |      |      |      |
|-------------------------------------|------|------|------|------|------|------|------|------|------|------|------|------|------|------|------|------|
| plate)                              |      |      |      |      |      |      |      |      |      |      |      |      |      |      |      |      |
| Maxillopalatine<br>(palatine shelf) | 0.11 | 0.12 | 0.18 | 0.23 | 0.18 | 0.15 | 0.14 | 0.11 | 0.16 | 0.22 | 0.30 | 0.36 | 0.54 | 0.70 |      |      |
| Pterygoid                           | 0.16 | 0.12 | 0.15 | 0.16 | 0.21 | 0.29 | 0.45 | 0.22 | 0.43 | 0.13 | 0.16 | 0.12 | 0.14 | 0.07 | 0.80 |      |
| Stapes                              | 0.09 | 0.22 | 0.11 | 0.19 | 0.32 | 0.26 | 0.46 | 0.32 | 0.42 | 0.17 | 0.25 | 0.25 | 0.15 | 0.12 | 0.19 | 0.86 |

**Table S2.** Results of EMMLi analysis for trait correlations ( $\rho$ ) within and between 16 cranial regions, for the 10% subsampled analyses, averaged over 100 iterations.

|                           | Frontal | Parietal | Nasopremaxilla (dorsal) | Maxillopalatine (lateral) | Os basale (occipital) | Occipital condyle | Quadrate (jaw joint) | Squamosal | Quadrate (lateral) | Os basale (ventral) | Nasopremaxilla (palatal) | Vomer | Maxillopalatine (interdental plate) | Maxillopalatine (palatine shelf) | Pterygoid | Stapes |
|---------------------------|---------|----------|-------------------------|---------------------------|-----------------------|-------------------|----------------------|-----------|--------------------|---------------------|--------------------------|-------|-------------------------------------|----------------------------------|-----------|--------|
| Frontal                   | 0.69    |          |                         |                           |                       |                   |                      |           |                    |                     |                          |       |                                     |                                  |           |        |
| Parietal                  | 0.40    | 0.66     |                         |                           |                       |                   |                      |           |                    |                     |                          |       |                                     |                                  |           |        |
| Nasopremaxilla (dorsal)   | 0.31    | 0.16     | 0.50                    |                           |                       |                   |                      |           |                    |                     |                          |       |                                     |                                  |           |        |
| Maxillopalatine (lateral) | 0.17    | 0.17     | 0.19                    | 0.54                      |                       |                   |                      |           |                    |                     |                          |       |                                     |                                  |           |        |
| Os basale (occipital)     | 0.09    | 0.26     | 0.09                    | 0.12                      | 0.70                  |                   |                      |           |                    |                     |                          |       |                                     |                                  |           |        |
| Occipital condyle         | 0.04    | 0.26     | 0.08                    | 0.15                      | 0.71                  | 0.94              |                      |           |                    |                     |                          |       |                                     |                                  |           |        |
| Quadrate (jaw joint)      | 0.17    | 0.34     | 0.10                    | 0.27                      | 0.42                  | 0.55              | 0.97                 |           |                    |                     |                          |       |                                     |                                  |           |        |
| Squamosal                 | 0.12    | 0.21     | 0.11                    | 0.33                      | 0.12                  | 0.22              | 0.52                 | 0.74      |                    |                     |                          |       |                                     |                                  |           |        |
| Quadrate (lateral)        | 0.17    | 0.28     | 0.14                    | 0.25                      | 0.29                  | 0.37              | 0.80                 | 0.50      | 0.76               |                     |                          |       |                                     |                                  |           |        |
| Os basale (ventral)       | 0.15    | 0.12     | 0.10                    | 0.10                      | 0.29                  | 0.31              | 0.14                 | 0.13      | 0.14               | 0.54                |                          |       |                                     |                                  |           |        |
| Nasopremaxilla (palatal)  | 0.18    | 0.20     | 0.25                    | 0.20                      | 0.13                  | 0.05              | 0.10                 | 0.17      | 0.13               | 0.14                | 0.83                     |       |                                     |                                  |           |        |

|                                        |      |          |      |      |          |          |          |      |          |      |      |          |      |      |          |          |
|----------------------------------------|------|----------|------|------|----------|----------|----------|------|----------|------|------|----------|------|------|----------|----------|
| Vomer                                  | 0.14 | 0.1<br>6 | 0.15 | 0.18 | 0.1<br>8 | 0.1<br>2 | 0.2<br>3 | 0.33 | 0.2<br>3 | 0.35 | 0.44 | 0.7<br>7 |      |      |          |          |
| Maxillopalatine<br>(interdental plate) | 0.15 | 0.1<br>5 | 0.22 | 0.38 | 0.1<br>2 | 0.0<br>8 | 0.1<br>6 | 0.16 | 0.1<br>8 | 0.11 | 0.43 | 0.2<br>0 | 0.84 |      |          |          |
| Maxillopalatine<br>(palatine shelf)    | 0.11 | 0.1<br>2 | 0.18 | 0.23 | 0.1<br>8 | 0.1<br>5 | 0.1<br>4 | 0.11 | 0.1<br>6 | 0.22 | 0.30 | 0.3<br>6 | 0.53 | 0.69 |          |          |
| Pterygoid                              | 0.16 | 0.1<br>2 | 0.15 | 0.16 | 0.2<br>1 | 0.2<br>9 | 0.4<br>5 | 0.22 | 0.4<br>3 | 0.13 | 0.16 | 0.1<br>2 | 0.14 | 0.07 | 0.7<br>8 |          |
| Stapes                                 | 0.09 | 0.2<br>1 | 0.11 | 0.19 | 0.3<br>2 | 0.2<br>6 | 0.4<br>5 | 0.31 | 0.4<br>1 | 0.17 | 0.26 | 0.2<br>6 | 0.15 | 0.12 | 0.1<br>9 | 0.8<br>5 |

**Table S3.** Results of EMMLi analysis for trait correlations ( $\rho$ ) within and between 16 cranial regions, for the anatomical landmark only dataset. The stapes and pterygoid regions are excluded from this analysis as they are only represented by semilandmarks.

|                                     | Frontal | Parietal | Nasopremaxilla (dorsal) | Maxillopalatine (lateral) | Os basale (occipital) | Occipital condyle | Quadrate (jaw joint) | Squamosal | Quadrate (lateral) | Os basale (ventral) | Nasopremaxilla (palatal) | Vomer | Maxillopalatine (interdental plate) | Maxillopalatine (palatine shelf) |
|-------------------------------------|---------|----------|-------------------------|---------------------------|-----------------------|-------------------|----------------------|-----------|--------------------|---------------------|--------------------------|-------|-------------------------------------|----------------------------------|
| Frontal                             | 0.35    |          |                         |                           |                       |                   |                      |           |                    |                     |                          |       |                                     |                                  |
| Parietal                            | 0.54    | 0.17     |                         |                           |                       |                   |                      |           |                    |                     |                          |       |                                     |                                  |
| Nasopremaxilla (dorsal)             | 0.33    | 0.14     | 0.37                    |                           |                       |                   |                      |           |                    |                     |                          |       |                                     |                                  |
| Maxillopalatine (lateral)           | 0.2     | 0.15     | 0.25                    | 0.34                      |                       |                   |                      |           |                    |                     |                          |       |                                     |                                  |
| Os basale (occipital)               | 0.1     | 0.34     | 0.09                    | 0.17                      | 0.5                   |                   |                      |           |                    |                     |                          |       |                                     |                                  |
| Occipital condyle                   | 0.07    | 0.28     | 0.07                    | 0.2                       | 0.69                  | 0.86              |                      |           |                    |                     |                          |       |                                     |                                  |
| Quadrate (jaw joint)                | 0.16    | 0.24     | 0.13                    | 0.41                      | 0.42                  | 0.5               | 0.92                 |           |                    |                     |                          |       |                                     |                                  |
| Squamosal                           | 0.14    | 0.16     | 0.13                    | 0.45                      | 0.18                  | 0.2               | 0.51                 | 0.52      |                    |                     |                          |       |                                     |                                  |
| Quadrate (lateral)                  | 0.19    | 0.2      | 0.15                    | 0.28                      | 0.25                  | 0.29              | 0.52                 | 0.44      | 0.12               |                     |                          |       |                                     |                                  |
| Os basale (ventral)                 | 0.13    | 0.19     | 0.1                     | 0.16                      | 0.33                  | 0.46              | 0.18                 | 0.14      | 0.18               | 0.24                |                          |       |                                     |                                  |
| Nasopremaxilla (palatal)            | 0.2     | 0.16     | 0.29                    | 0.33                      | 0.11                  | 0.02              | 0.12                 | 0.18      | 0.14               | 0.13                | 0.5                      |       |                                     |                                  |
| Vomer                               | 0.15    | 0.19     | 0.15                    | 0.21                      | 0.14                  | 0.12              | 0.18                 | 0.24      | 0.15               | 0.31                | 0.46                     | 0.34  |                                     |                                  |
| Maxillopalatine (interdental plate) | 0.16    | 0.14     | 0.2                     | 0.46                      | 0.12                  | 0.09              | 0.21                 | 0.21      | 0.15               | 0.13                | 0.44                     | 0.24  | 0.54                                |                                  |
| Maxillopalatine (palatine shelf)    | 0.12    | 0.14     | 0.14                    | 0.24                      | 0.18                  | 0.17              | 0.21                 | 0.14      | 0.17               | 0.22                | 0.27                     | 0.37  | 0.39                                | 0.42                             |

**Table S4.** Results of EMMLi analysis for trait correlations ( $\rho$ ) within and between 16 cranial regions, for the allometry-corrected data. Analyses were conducted on all 16 cranial regions.

|                                     | Frontal | Parietal | Nasopremaxilla (dorsal) | Maxillopalatine (lateral) | Os basale (occipital) | Occipital condyle | Quadrate (jaw joint) | Squamosal | Quadrate (lateral) | Os basale (ventral) | Nasopremaxilla (palatal) | Vomer | Maxillopalatine (interdental plate) | Maxillopalatine (palatine shelf) | Pterygoid | Stapes |
|-------------------------------------|---------|----------|-------------------------|---------------------------|-----------------------|-------------------|----------------------|-----------|--------------------|---------------------|--------------------------|-------|-------------------------------------|----------------------------------|-----------|--------|
| Frontal                             | 0.69    |          |                         |                           |                       |                   |                      |           |                    |                     |                          |       |                                     |                                  |           |        |
| Parietal                            | 0.43    | 0.68     |                         |                           |                       |                   |                      |           |                    |                     |                          |       |                                     |                                  |           |        |
| Nasopremaxilla (dorsal)             | 0.31    | 0.17     | 0.5                     |                           |                       |                   |                      |           |                    |                     |                          |       |                                     |                                  |           |        |
| Maxillopalatine (lateral)           | 0.17    | 0.15     | 0.2                     | 0.53                      |                       |                   |                      |           |                    |                     |                          |       |                                     |                                  |           |        |
| Os basale (occipital)               | 0.13    | 0.18     | 0.12                    | 0.12                      | 0.6                   |                   |                      |           |                    |                     |                          |       |                                     |                                  |           |        |
| Occipital condyle                   | 0.1     | 0.17     | 0.11                    | 0.09                      | 0.6                   | 0.9               |                      |           |                    |                     |                          |       |                                     |                                  |           |        |
| Quadrate (jaw joint)                | 0.24    | 0.27     | 0.1                     | 0.23                      | 0.25                  | 0.4               | 0.97                 |           |                    |                     |                          |       |                                     |                                  |           |        |
| Squamosal                           | 0.13    | 0.16     | 0.11                    | 0.3                       | 0.14                  | 0.13              | 0.49                 | 0.74      |                    |                     |                          |       |                                     |                                  |           |        |
| Quadrate (lateral)                  | 0.21    | 0.24     | 0.14                    | 0.21                      | 0.19                  | 0.28              | 0.79                 | 0.47      | 0.77               |                     |                          |       |                                     |                                  |           |        |
| Os basale (ventral)                 | 0.16    | 0.12     | 0.12                    | 0.12                      | 0.23                  | 0.23              | 0.16                 | 0.16      | 0.17               | 0.54                |                          |       |                                     |                                  |           |        |
| Nasopremaxilla (palatal)            | 0.17    | 0.2      | 0.26                    | 0.19                      | 0.18                  | 0.12              | 0.08                 | 0.17      | 0.12               | 0.18                | 0.83                     |       |                                     |                                  |           |        |
| Vomer                               | 0.13    | 0.16     | 0.15                    | 0.2                       | 0.19                  | 0.16              | 0.28                 | 0.37      | 0.26               | 0.38                | 0.44                     | 0.79  |                                     |                                  |           |        |
| Maxillopalatine (interdental plate) | 0.15    | 0.19     | 0.23                    | 0.33                      | 0.11                  | 0.06              | 0.13                 | 0.13      | 0.14               | 0.11                | 0.44                     | 0.19  | 0.82                                |                                  |           |        |
| Maxillopalatine                     | 0.13    | 0.19     | 0.19                    | 0.19                      | 0.13                  | 0.11              | 0.14                 | 0.15      | 0.17               | 0.21                | 0.29                     | 0.37  | 0.46                                | 0.66                             |           |        |

|                  |      |      |      |      |      |      |      |      |      |      |      |      |      |      |      |      |
|------------------|------|------|------|------|------|------|------|------|------|------|------|------|------|------|------|------|
| (palatine shelf) |      |      |      |      |      |      |      |      |      |      |      |      |      |      |      |      |
| Pterygoid        | 0.16 | 0.1  | 0.15 | 0.15 | 0.16 | 0.25 | 0.42 | 0.21 | 0.41 | 0.14 | 0.16 | 0.13 | 0.18 | 0.13 | 0.8  |      |
| Stapes           | 0.12 | 0.21 | 0.1  | 0.2  | 0.32 | 0.21 | 0.44 | 0.35 | 0.41 | 0.2  | 0.22 | 0.26 | 0.17 | 0.09 | 0.18 | 0.87 |

**Table S5.** Results of EMMLi analysis for trait correlations ( $\rho$ ) within and between 16 cranial regions, for the phylogenetically-corrected dataset. Analyses were conducted on all 16 cranial regions.

|                           | Frontal | Parietal | Nasopremaxilla (dorsal) | Maxillopalatine (lateral) | Os basale (occipital) | Occipital condyle | Quadrate (jaw joint) | Squamosal | Quadrate (lateral) | Os basale (ventral) | Nasopremaxilla (palatal) | Vomer | Maxillopalatine (interdental plate) | Maxillopalatine (palatine shelf) | Pterygoid | Stapes |
|---------------------------|---------|----------|-------------------------|---------------------------|-----------------------|-------------------|----------------------|-----------|--------------------|---------------------|--------------------------|-------|-------------------------------------|----------------------------------|-----------|--------|
| Frontal                   | 0.7     |          |                         |                           |                       |                   |                      |           |                    |                     |                          |       |                                     |                                  |           |        |
| Parietal                  | 0.47    | 0.7<br>1 |                         |                           |                       |                   |                      |           |                    |                     |                          |       |                                     |                                  |           |        |
| Nasopremaxilla (dorsal)   | 0.25    | 0.1<br>3 | 0.49                    |                           |                       |                   |                      |           |                    |                     |                          |       |                                     |                                  |           |        |
| Maxillopalatine (lateral) | 0.18    | 0.1<br>9 | 0.19                    | 0.55                      |                       |                   |                      |           |                    |                     |                          |       |                                     |                                  |           |        |
| Os basale (occipital)     | 0.15    | 0.3<br>9 | 0.1                     | 0.2                       | 0.7<br>1              |                   |                      |           |                    |                     |                          |       |                                     |                                  |           |        |
| Occipital condyle         | 0.12    | 0.3<br>7 | 0.11                    | 0.21                      | 0.7<br>3              | 0.9<br>5          |                      |           |                    |                     |                          |       |                                     |                                  |           |        |
| Quadrate (jaw joint)      | 0.37    | 0.4<br>8 | 0.14                    | 0.28                      | 0.5<br>6              | 0.6<br>4          | 0.9<br>8             |           |                    |                     |                          |       |                                     |                                  |           |        |
| Squamosal                 | 0.2     | 0.2<br>6 | 0.14                    | 0.29                      | 0.2<br>7              | 0.3<br>6          | 0.5<br>6             | 0.69      |                    |                     |                          |       |                                     |                                  |           |        |
| Quadrate (lateral)        | 0.31    | 0.4      | 0.15                    | 0.25                      | 0.4<br>3              | 0.5<br>1          | 0.8<br>5             | 0.53      | 0.8<br>1           |                     |                          |       |                                     |                                  |           |        |
| Os basale (ventral)       | 0.12    | 0.1<br>1 | 0.07                    | 0.11                      | 0.2<br>2              | 0.2<br>5          | 0.2                  | 0.13      | 0.1<br>7           | 0.5                 |                          |       |                                     |                                  |           |        |
| Nasopremaxilla (palatal)  | 0.16    | 0.1<br>4 | 0.25                    | 0.18                      | 0.1                   | 0.0<br>7          | 0.0<br>8             | 0.13      | 0.1                | 0.09                | 0.79                     |       |                                     |                                  |           |        |

|                                        |      |      |      |      |      |      |      |      |      |      |      |      |      |      |      |      |
|----------------------------------------|------|------|------|------|------|------|------|------|------|------|------|------|------|------|------|------|
| Vomer                                  | 0.12 | 0.1  | 0.13 | 0.13 | 0.09 | 0.1  | 0.26 | 0.25 | 0.23 | 0.3  | 0.46 | 0.77 |      |      |      |      |
| Maxillopalatine<br>(interdental plate) | 0.19 | 0.21 | 0.2  | 0.4  | 0.19 | 0.16 | 0.28 | 0.27 | 0.26 | 0.14 | 0.36 | 0.22 | 0.83 |      |      |      |
| Maxillopalatine<br>(palatine shelf)    | 0.13 | 0.12 | 0.15 | 0.28 | 0.19 | 0.19 | 0.2  | 0.2  | 0.2  | 0.2  | 0.25 | 0.33 | 0.55 | 0.71 |      |      |
| Pterygoid                              | 0.12 | 0.16 | 0.12 | 0.19 | 0.28 | 0.33 | 0.41 | 0.24 | 0.4  | 0.12 | 0.09 | 0.11 | 0.16 | 0.17 | 0.78 |      |
| Stapes                                 | 0.21 | 0.26 | 0.13 | 0.16 | 0.35 | 0.35 | 0.55 | 0.27 | 0.47 | 0.15 | 0.23 | 0.25 | 0.19 | 0.14 | 0.22 | 0.87 |



**Table S6.** Covariance Ratio results for the full landmark and semilandmark dataset between each of the 16 cranial regions.

|                                     | Frontal | Parietal | Nasopremaxilla (dorsal) | Maxillopalatine (lateral) | Os basale (occipital) | Occipital condyle | Quadrate (jaw joint) | Squamosal | Quadrate (lateral) | Os basale (ventral) | Nasopremaxilla (palatal) | Vomer | Maxillopalatine (interdental plate) | Maxillopalatine (palatine shelf) | Pterygoid |
|-------------------------------------|---------|----------|-------------------------|---------------------------|-----------------------|-------------------|----------------------|-----------|--------------------|---------------------|--------------------------|-------|-------------------------------------|----------------------------------|-----------|
| Parietal                            | 0.72    |          |                         |                           |                       |                   |                      |           |                    |                     |                          |       |                                     |                                  |           |
| Nasopremaxilla (dorsal)             | 0.71    | 0.54     |                         |                           |                       |                   |                      |           |                    |                     |                          |       |                                     |                                  |           |
| Maxillopalatine (lateral)           | 0.67    | 0.71     | 0.72                    |                           |                       |                   |                      |           |                    |                     |                          |       |                                     |                                  |           |
| Os basale (occipital)               | 0.48    | 0.59     | 0.44                    | 0.64                      |                       |                   |                      |           |                    |                     |                          |       |                                     |                                  |           |
| Occipital condyle                   | 0.34    | 0.49     | 0.37                    | 0.59                      | 0.94                  |                   |                      |           |                    |                     |                          |       |                                     |                                  |           |
| Quadrate (jaw joint)                | 0.56    | 0.69     | 0.44                    | 0.52                      | 0.71                  | 0.69              |                      |           |                    |                     |                          |       |                                     |                                  |           |
| Squamosal                           | 0.69    | 0.84     | 0.64                    | 0.76                      | 0.61                  | 0.56              | 0.71                 |           |                    |                     |                          |       |                                     |                                  |           |
| Quadrate (lateral)                  | 0.62    | 0.73     | 0.56                    | 0.6                       | 0.7                   | 0.66              | 0.97                 | 0.8       |                    |                     |                          |       |                                     |                                  |           |
| Os basale (ventral)                 | 0.58    | 0.45     | 0.49                    | 0.59                      | 0.67                  | 0.63              | 0.35                 | 0.56      | 0.46               |                     |                          |       |                                     |                                  |           |
| Nasopremaxilla (palatal)            | 0.64    | 0.65     | 0.76                    | 0.58                      | 0.45                  | 0.28              | 0.32                 | 0.65      | 0.47               | 0.45                |                          |       |                                     |                                  |           |
| Vomer                               | 0.62    | 0.63     | 0.54                    | 0.51                      | 0.42                  | 0.31              | 0.35                 | 0.64      | 0.46               | 0.79                | 0.73                     |       |                                     |                                  |           |
| Maxillopalatine (interdental plate) | 0.59    | 0.57     | 0.69                    | 0.74                      | 0.7                   | 0.62              | 0.46                 | 0.65      | 0.57               | 0.6                 | 0.7                      | 0.45  |                                     |                                  |           |
| Maxillopalatine (palatine shelf)    | 0.54    | 0.59     | 0.62                    | 0.68                      | 0.7                   | 0.61              | 0.5                  | 0.64      | 0.6                | 0.68                | 0.57                     | 0.62  | 0.8                                 |                                  |           |
| Pterygoid                           | 0.45    | 0.33     | 0.53                    | 0.43                      | 0.49                  | 0.44              | 0.52                 | 0.49      | 0.59               | 0.44                | 0.43                     | 0.37  | 0.48                                | 0.42                             |           |
| Stapes                              | 0.64    | 0.79     | 0.57                    | 0.63                      | 0.67                  | 0.57              | 0.81                 | 0.77      | 0.84               | 0.45                | 0.61                     | 0.47  | 0.55                                | 0.53                             | 0.53      |

**Table S7.** Covariance Ratio results using only anatomical landmarks for 14 cranial regions. The stapes and pterygoid regions are excluded from this analysis as they are only represented by semilandmarks.

|                                     | Frontal | Parietal | Nasopremaxilla (dorsal) | Maxillopalatine (lateral) | Os basale (occipital) | Occipital condyle | Quadrate (jaw joint) | Squamosal | Quadrate (lateral) | Os basale (ventral) | Nasopremaxilla (palatal) | Vomer | Maxillopalatine (interdental plate) |
|-------------------------------------|---------|----------|-------------------------|---------------------------|-----------------------|-------------------|----------------------|-----------|--------------------|---------------------|--------------------------|-------|-------------------------------------|
| Parietal                            | 1.40    |          |                         |                           |                       |                   |                      |           |                    |                     |                          |       |                                     |
| Nasopremaxilla (dorsal)             | 1.16    | 0.80     |                         |                           |                       |                   |                      |           |                    |                     |                          |       |                                     |
| Maxillopalatine (lateral)           | 1.14    | 1.07     | 1.09                    |                           |                       |                   |                      |           |                    |                     |                          |       |                                     |
| Os basale (occipital)               | 0.70    | 0.94     | 0.66                    | 0.92                      |                       |                   |                      |           |                    |                     |                          |       |                                     |
| Occipital condyle                   | 0.54    | 0.80     | 0.54                    | 0.88                      | 1.15                  |                   |                      |           |                    |                     |                          |       |                                     |
| Quadrate (jaw joint)                | 0.78    | 0.89     | 0.64                    | 0.85                      | 0.89                  | 0.82              |                      |           |                    |                     |                          |       |                                     |
| Squamosal                           | 0.99    | 0.96     | 0.95                    | 1.09                      | 0.81                  | 0.73              | 0.87                 |           |                    |                     |                          |       |                                     |
| Quadrate (lateral)                  | 1.03    | 1.00     | 1.05                    | 1.09                      | 0.98                  | 0.93              | 1.10                 | 1.22      |                    |                     |                          |       |                                     |
| Os basale (ventral)                 | 0.96    | 0.96     | 0.72                    | 0.91                      | 0.89                  | 1.04              | 0.51                 | 0.81      | 0.89               |                     |                          |       |                                     |
| Nasopremaxilla (palatal)            | 1.04    | 0.87     | 1.20                    | 1.01                      | 0.60                  | 0.40              | 0.52                 | 0.95      | 1.02               | 0.60                |                          |       |                                     |
| Vomer                               | 0.94    | 0.96     | 0.79                    | 0.74                      | 0.61                  | 0.49              | 0.42                 | 0.85      | 0.77               | 0.93                | 1.12                     |       |                                     |
| Maxillopalatine (interdental plate) | 0.97    | 0.92     | 1.06                    | 1.17                      | 0.85                  | 0.77              | 0.62                 | 0.93      | 1.01               | 0.75                | 1.18                     | 0.75  |                                     |
| Maxillopalatine (palatine shelf)    | 0.85    | 0.93     | 0.82                    | 0.94                      | 0.89                  | 0.82              | 0.68                 | 0.83      | 1.06               | 0.81                | 0.87                     | 0.94  | 0.96                                |

**Table S8.** Covariance Ratio results for the full landmark and semilandmark dataset, corrected for allometry.

|                                     | Frontal | Parietal | Nasopremaxilla (dorsal) | Maxillopalatine (lateral) | Os basale (occipital) | Occipital condyle | Quadrata (jaw joint) | Squamosal | Quadrata (lateral) | Os basale (ventral) | Nasopremaxilla (palatal) | Vomer | Maxillopalatine (interdental plate) | Maxillopalatine (palatine shelf) | Pterygoid |
|-------------------------------------|---------|----------|-------------------------|---------------------------|-----------------------|-------------------|----------------------|-----------|--------------------|---------------------|--------------------------|-------|-------------------------------------|----------------------------------|-----------|
| Parietal                            | 0.75    |          |                         |                           |                       |                   |                      |           |                    |                     |                          |       |                                     |                                  |           |
| Nasopremaxilla (dorsal)             | 0.72    | 0.58     |                         |                           |                       |                   |                      |           |                    |                     |                          |       |                                     |                                  |           |
| Maxillopalatine (lateral)           | 0.71    | 0.72     | 0.75                    |                           |                       |                   |                      |           |                    |                     |                          |       |                                     |                                  |           |
| Os basale (occipital)               | 0.60    | 0.61     | 0.54                    | 0.58                      |                       |                   |                      |           |                    |                     |                          |       |                                     |                                  |           |
| Occipital condyle                   | 0.46    | 0.41     | 0.45                    | 0.45                      | 0.85                  |                   |                      |           |                    |                     |                          |       |                                     |                                  |           |
| Quadrata (jaw joint)                | 0.61    | 0.62     | 0.47                    | 0.43                      | 0.58                  | 0.56              |                      |           |                    |                     |                          |       |                                     |                                  |           |
| Squamosal                           | 0.71    | 0.87     | 0.65                    | 0.76                      | 0.66                  | 0.52              | 0.68                 |           |                    |                     |                          |       |                                     |                                  |           |
| Quadrata (lateral)                  | 0.67    | 0.71     | 0.59                    | 0.55                      | 0.63                  | 0.56              | 0.96                 | 0.78      |                    |                     |                          |       |                                     |                                  |           |
| Os basale (ventral)                 | 0.62    | 0.57     | 0.51                    | 0.57                      | 0.64                  | 0.56              | 0.35                 | 0.60      | 0.49               |                     |                          |       |                                     |                                  |           |
| Nasopremaxilla (palatal)            | 0.61    | 0.63     | 0.76                    | 0.60                      | 0.57                  | 0.39              | 0.36                 | 0.68      | 0.51               | 0.49                |                          |       |                                     |                                  |           |
| Vomer                               | 0.60    | 0.67     | 0.53                    | 0.53                      | 0.50                  | 0.37              | 0.42                 | 0.66      | 0.51               | 0.82                | 0.71                     |       |                                     |                                  |           |
| Maxillopalatine (interdental plate) | 0.62    | 0.60     | 0.73                    | 0.70                      | 0.58                  | 0.42              | 0.37                 | 0.66      | 0.55               | 0.52                | 0.74                     | 0.43  |                                     |                                  |           |
| Maxillopalatine (palatine shelf)    | 0.58    | 0.67     | 0.67                    | 0.65                      | 0.63                  | 0.43              | 0.43                 | 0.68      | 0.61               | 0.66                | 0.60                     | 0.64  | 0.72                                |                                  |           |
| Pterygoid                           | 0.46    | 0.34     | 0.54                    | 0.45                      | 0.50                  | 0.43              | 0.53                 | 0.51      | 0.58               | 0.47                | 0.46                     | 0.38  | 0.50                                | 0.47                             |           |
| Stapes                              | 0.67    | 0.75     | 0.60                    | 0.63                      | 0.70                  | 0.51              | 0.75                 | 0.76      | 0.80               | 0.51                | 0.63                     | 0.50  | 0.58                                | 0.58                             | 0.56      |

**Table S9.** Covariance Ratio results for the full landmark and semilandmark dataset, corrected for phylogeny.

|                                     | Frontal | Parietal | Nasopremaxilla (dorsal) | Maxillopalatine (lateral) | Os basale (occipital) | Occipital condyle | Quadrate (jaw joint) | Squamosal | Quadrate (lateral) | Os basale (ventral) | Nasopremaxilla (palatal) | Vomer | Maxillopalatine (interdental shelf) | Maxillopalatine (palatine) | Pterygoid |
|-------------------------------------|---------|----------|-------------------------|---------------------------|-----------------------|-------------------|----------------------|-----------|--------------------|---------------------|--------------------------|-------|-------------------------------------|----------------------------|-----------|
| Parietal                            | 0.79    |          |                         |                           |                       |                   |                      |           |                    |                     |                          |       |                                     |                            |           |
| Nasopremaxilla (dorsal)             | 0.68    | 0.58     |                         |                           |                       |                   |                      |           |                    |                     |                          |       |                                     |                            |           |
| Maxillopalatine (lateral)           | 0.57    | 0.66     | 0.68                    |                           |                       |                   |                      |           |                    |                     |                          |       |                                     |                            |           |
| Os basale (occipital)               | 0.50    | 0.73     | 0.56                    | 0.75                      |                       |                   |                      |           |                    |                     |                          |       |                                     |                            |           |
| Occipital condyle                   | 0.37    | 0.62     | 0.49                    | 0.69                      | 0.95                  |                   |                      |           |                    |                     |                          |       |                                     |                            |           |
| Quadrate (jaw joint)                | 0.73    | 0.83     | 0.52                    | 0.58                      | 0.82                  | 0.75              |                      |           |                    |                     |                          |       |                                     |                            |           |
| Squamosal                           | 0.72    | 0.86     | 0.62                    | 0.69                      | 0.79                  | 0.75              | 0.85                 |           |                    |                     |                          |       |                                     |                            |           |
| Quadrate (lateral)                  | 0.75    | 0.85     | 0.55                    | 0.61                      | 0.84                  | 0.75              | 0.99                 | 0.89      |                    |                     |                          |       |                                     |                            |           |
| Os basale (ventral)                 | 0.58    | 0.53     | 0.50                    | 0.61                      | 0.68                  | 0.66              | 0.54                 | 0.64      | 0.57               |                     |                          |       |                                     |                            |           |
| Nasopremaxilla (palatal)            | 0.60    | 0.60     | 0.75                    | 0.54                      | 0.50                  | 0.37              | 0.41                 | 0.55      | 0.44               | 0.43                |                          |       |                                     |                            |           |
| Vomer                               | 0.59    | 0.64     | 0.55                    | 0.48                      | 0.43                  | 0.36              | 0.48                 | 0.60      | 0.51               | 0.69                | 0.72                     |       |                                     |                            |           |
| Maxillopalatine (interdental shelf) | 0.55    | 0.67     | 0.71                    | 0.78                      | 0.80                  | 0.75              | 0.62                 | 0.70      | 0.65               | 0.63                | 0.62                     | 0.48  |                                     |                            |           |
| Maxillopalatine (palatine shelf)    | 0.50    | 0.64     | 0.65                    | 0.69                      | 0.77                  | 0.74              | 0.63                 | 0.68      | 0.65               | 0.66                | 0.55                     | 0.56  | 0.84                                |                            |           |
| Pterygoid                           | 0.45    | 0.48     | 0.50                    | 0.52                      | 0.61                  | 0.57              | 0.57                 | 0.58      | 0.61               | 0.56                | 0.35                     | 0.48  | 0.54                                | 0.56                       |           |
| Stapes                              | 0.75    | 0.84     | 0.59                    | 0.61                      | 0.77                  | 0.68              | 0.90                 | 0.81      | 0.89               | 0.52                | 0.58                     | 0.52  | 0.62                                | 0.56                       | 0.51      |

**Table S10.** Results from EMMLi analysis for trait correlations ( $\rho$ ) within and between the ten identified cranial modules, using phylogenetically-corrected data.

|                          | Frontal | Parietal | Nasopremaxilla (dorsal) | Maxillopalatine | Occipital | Quadrate-Squamosal | Ventral os basale-vomer | Nasopremaxilla (palatal) | Pterygoid | Stapes |
|--------------------------|---------|----------|-------------------------|-----------------|-----------|--------------------|-------------------------|--------------------------|-----------|--------|
| Frontal                  | 0.7     |          |                         |                 |           |                    |                         |                          |           |        |
| Parietal                 | 0.47    | 0.71     |                         |                 |           |                    |                         |                          |           |        |
| Nasopremaxilla (dorsal)  | 0.25    | 0.13     | 0.49                    |                 |           |                    |                         |                          |           |        |
| Maxillopalatine          | 0.17    | 0.17     | 0.18                    | 0.5             |           |                    |                         |                          |           |        |
| Occipital                | 0.15    | 0.39     | 0.1                     | 0.2             | 0.73      |                    |                         |                          |           |        |
| Quadrate-Squamosal       | 0.27    | 0.35     | 0.14                    | 0.25            | 0.41      | 0.71               |                         |                          |           |        |
| Ventral os basale-vomer  | 0.12    | 0.11     | 0.09                    | 0.17            | 0.18      | 0.18               | 0.46                    |                          |           |        |
| Nasopremaxilla (palatal) | 0.16    | 0.14     | 0.25                    | 0.25            | 0.09      | 0.11               | 0.21                    | 0.79                     |           |        |
| Pterygoid                | 0.12    | 0.16     | 0.12                    | 0.18            | 0.29      | 0.33               | 0.12                    | 0.09                     | 0.78      |        |
| Stapes                   | 0.21    | 0.26     | 0.13                    | 0.16            | 0.35      | 0.4                | 0.18                    | 0.23                     | 0.22      | 0.87   |

**Table S11.** Covariance Ratio results between each of the ten identified cranial modules, using phylogenetically corrected data.

|                          | Frontal | Parietal | Nasopremaxilla (dorsal) | Maxillopalatine | Occipital | Quadrate-squamosal | Ventral os basale-vomer | Nasopremaxilla (palatal) | Pterygoid |
|--------------------------|---------|----------|-------------------------|-----------------|-----------|--------------------|-------------------------|--------------------------|-----------|
| Parietal                 | 0.79    |          |                         |                 |           |                    |                         |                          |           |
| Nasopremaxilla (dorsal)  | 0.68    | 0.58     |                         |                 |           |                    |                         |                          |           |
| Maxillopalatine          | 0.59    | 0.71     | 0.74                    |                 |           |                    |                         |                          |           |
| Occipital                | 0.48    | 0.72     | 0.55                    | 0.82            |           |                    |                         |                          |           |
| Quadrate-squamosal       | 0.75    | 0.86     | 0.57                    | 0.70            | 0.83      |                    |                         |                          |           |
| Ventral os basale-vomer  | 0.63    | 0.62     | 0.56                    | 0.67            | 0.64      | 0.61               |                         |                          |           |
| Nasopremaxilla (palatal) | 0.60    | 0.60     | 0.75                    | 0.60            | 0.48      | 0.47               | 0.61                    |                          |           |
| Pterygoid                | 0.45    | 0.48     | 0.50                    | 0.58            | 0.61      | 0.60               | 0.57                    | 0.35                     |           |
| Stapes                   | 0.74    | 0.84     | 0.59                    | 0.64            | 0.76      | 0.90               | 0.56                    | 0.58                     | 0.51      |

**Table S12.** Summary of the PC axes for the full landmark and semilandmark dataset. 29 (indicated in bold) of the 34 PC axes were required to explain 99% of cranial shape variation.

|                        |             |             |             |             |             |             |             |             |             |             |
|------------------------|-------------|-------------|-------------|-------------|-------------|-------------|-------------|-------------|-------------|-------------|
|                        | <b>PC1</b>  | <b>PC2</b>  | <b>PC3</b>  | <b>PC4</b>  | <b>PC5</b>  | <b>PC6</b>  | <b>PC7</b>  | <b>PC8</b>  | <b>PC9</b>  | <b>PC10</b> |
| Standard deviation     | 0.05224     | 0.04406     | 0.03181     | 0.03047     | 0.02475     | 0.02248     | 0.01988     | 0.01817     | 0.01757     | 0.01533     |
| Proportion of Variance | 0.25671     | 0.18265     | 0.09521     | 0.08737     | 0.05765     | 0.04755     | 0.03717     | 0.03107     | 0.02903     | 0.0221      |
| Cumulative Proportion  | 0.25671     | 0.43936     | 0.53457     | 0.62194     | 0.67959     | 0.72713     | 0.7643      | 0.79537     | 0.82439     | 0.84649     |
|                        | <b>PC11</b> | <b>PC12</b> | <b>PC13</b> | <b>PC14</b> | <b>PC15</b> | <b>PC16</b> | <b>PC17</b> | <b>PC18</b> | <b>PC19</b> | <b>PC20</b> |
| Standard deviation     | 0.0144      | 0.01245     | 0.01183     | 0.01171     | 0.01078     | 0.009748    | 0.009577    | 0.008971    | 0.008639    | 0.007665    |
| Proportion of Variance | 0.0195      | 0.01458     | 0.01316     | 0.0129      | 0.01093     | 0.00894     | 0.00863     | 0.00757     | 0.00702     | 0.00553     |
| Cumulative Proportion  | 0.866       | 0.88057     | 0.89374     | 0.90664     | 0.91757     | 0.92651     | 0.93514     | 0.94272     | 0.94974     | 0.95526     |
|                        | <b>PC21</b> | <b>PC22</b> | <b>PC23</b> | <b>PC24</b> | <b>PC25</b> | <b>PC26</b> | <b>PC27</b> | <b>PC28</b> | <b>PC29</b> | PC30        |
| Standard deviation     | 0.007387    | 0.007118    | 0.007054    | 0.00661     | 0.006593    | 0.006075    | 0.005835    | 0.005472    | 0.005267    | 0.004982    |
| Proportion of Variance | 0.00513     | 0.00477     | 0.00468     | 0.00411     | 0.00409     | 0.00347     | 0.0032      | 0.00282     | 0.00261     | 0.00234     |
| Cumulative Proportion  | 0.9604      | 0.96516     | 0.96984     | 0.97395     | 0.97804     | 0.98152     | 0.98472     | 0.98754     | 0.99015     | 0.99248     |
|                        | PC31        | PC32        | PC33        | PC34        |             |             |             |             |             |             |
| Standard deviation     | 0.004845    | 0.004573    | 0.004475    | 0.003938    |             |             |             |             |             |             |
| Proportion of Variance | 0.00221     | 0.00197     | 0.00188     | 0.00146     |             |             |             |             |             |             |
| Cumulative Proportion  | 0.99469     | 0.99666     | 0.99854     | 1           |             |             |             |             |             |             |

**Table S13.** Centroid size of all specimens.

| <b>Species</b>                      | <b>Centroid size</b> |
|-------------------------------------|----------------------|
| <i>Atretochoana eiselti</i>         | 429.83               |
| <i>Boulengerula boulengeri</i>      | 79.72                |
| <i>Brasilotyphlus braziliensis</i>  | 115.38               |
| <i>Caecilia tentaculata</i>         | 284.91               |
| <i>Ichthyophis nigroflavus</i>      | 255.15               |
| <i>Chikila fulleri</i>              | 121.96               |
| <i>Chthonerpeton indistinctum</i>   | 237.84               |
| <i>Crotaphatrema bornmuelleri</i>   | 156.99               |
| <i>Crotaphatrema lamottei</i>       | 136.73               |
| <i>Dermophis mexicanus</i>          | 299.74               |
| <i>Epicrionops bicolor</i>          | 197.55               |
| <i>Gegeneophis carnosus</i>         | 75.15                |
| <i>Geotrypetes seraphini</i>        | 146.92               |
| <i>Grandisonia alternans</i>        | 178.54               |
| <i>Gymnopsis multiplicata</i>       | 309.86               |
| <i>Herpele squalostoma</i>          | 192.55               |
| <i>Hypogeophis rostratus</i>        | 124.27               |
| <i>Ichthyophis bombayensis</i>      | 252.80               |
| <i>Ichthyophis glutinosus</i>       | 246.50               |
| <i>Idiocranium russeli</i>          | 75.01                |
| <i>Indotyphlus cf. battersbyi</i>   | 86.15                |
| <i>Luetkenotyphlus brasiliensis</i> | 103.13               |
| <i>Microcaecilia albiceps</i>       | 111.87               |
| <i>Mimosiphonops vermiculatus</i>   | 142.57               |
| <i>Nectocaecilia petersii</i>       | 251.04               |
| <i>Osaecilia ochrocephala</i>       | 126.26               |



|                                    |        |
|------------------------------------|--------|
| <i>Potomotyphlus kaupii</i>        | 161.32 |
| <i>Praslinia cooperi</i>           | 157.78 |
| <i>Rhinatrema bivittatum</i>       | 170.79 |
| <i>Schistometopum gregorii</i>     | 163.21 |
| <i>Scolecormorphus kirkii</i>      | 148.90 |
| <i>Siphonops annulatus</i>         | 282.88 |
| <i>Sylvacaecilia grandisonae</i>   | 209.00 |
| <i>Typhlonectes compressicauda</i> | 224.47 |
| <i>Uraeotyphlus oxyurus</i>        | 152.94 |

**Table S14.** Differences ( $\times 10^{-6}$ ) in the observed means of disparity among the ten cranial modules. A negative value indicates the module in the column has a higher disparity than the module in the row. Test performed using the ‘TukeyHSD’ function in R. \*  $p \leq 0.05$ , \*\* $p \leq 0.01$ , \*\*\* $p \leq 0.001$ , \*\*\*\* $p \leq 0.0000001$ .

|                          | Frontal   | Parietal  | Nasopremaxilla (dorsal) | Maxillopalatine | Occipital | Quadrates-Squamosal | Ventral os basale-vomer | Nasopremaxilla (palatal) | Pterygoid |
|--------------------------|-----------|-----------|-------------------------|-----------------|-----------|---------------------|-------------------------|--------------------------|-----------|
| Parietal                 | 2.18****  |           |                         |                 |           |                     |                         |                          |           |
| Nasopremaxilla (dorsal)  | -0.47     | -2.64**** |                         |                 |           |                     |                         |                          |           |
| Maxillopalatine          | 1.57***   | -0.61     | 2.04****                |                 |           |                     |                         |                          |           |
| Occipital                | -1.66**** | -3.84**** | -1.19**                 | -3.23****       |           |                     |                         |                          |           |
| Quadrates-Squamosal      | 4.04****  | 1.86****  | 4.51****                | 2.47****        | 5.70****  |                     |                         |                          |           |
| Ventral os basale-vomer  | -1.39**** | -3.57**** | -0.92*                  | -2.96****       | 0.27      | -5.43****           |                         |                          |           |
| Nasopremaxilla (palatal) | -0.83     | -3.01**** | -0.36                   | -2.40****       | 0.83      | -4.87****           | 0.56                    |                          |           |
| Pterygoid                | 4.40****  | 2.22****  | 4.87****                | 2.83****        | 6.06****  | 0.36                | 5.79****                | 5.23****                 |           |
| Stapes                   | -1.60     | -3.78**** | -1.13                   | -3.17****       | 0.06      | -5.64****           | -0.21                   | -0.77                    | -6.00**** |

**Table S15.** Significance ( $p$ ) values for differences in rates of morphological evolution among the ten cranial modules identified in this study. Results indicated in bold are significant ( $p < 0.05$ ).

|                          | Frontal | Parietal     | Nasopremaxilla (dorsal) | Maxillopalatine | Occipital    | Quadrate-Squamosal | Ventral os basale-vomer | Nasopremaxilla (palatal) | Pterygoid |
|--------------------------|---------|--------------|-------------------------|-----------------|--------------|--------------------|-------------------------|--------------------------|-----------|
| Parietal                 | 1       |              |                         |                 |              |                    |                         |                          |           |
| Nasopremaxilla (dorsal)  | 1       | 1            |                         |                 |              |                    |                         |                          |           |
| Maxillopalatine          | 1       | 1            | 0.093                   |                 |              |                    |                         |                          |           |
| Occipital                | 1       | 1            | 0.738                   | 0.146           |              |                    |                         |                          |           |
| Quadrate-Squamosal       | 1       | 0.866        | <b>0.001</b>            | 0.381           | <b>0.005</b> |                    |                         |                          |           |
| Ventral os basale-vomer  | 1       | 0.191        | 0.933                   | 0.524           | 0.822        | <b>0.001</b>       |                         |                          |           |
| Nasopremaxilla (palatal) | 1       | <b>0.003</b> | 1                       | 0.999           | 1            | <b>0.002</b>       | 0.989                   |                          |           |
| Pterygoid                | 0.243   | 1            | 0.999                   | 1               | 0.998        | 0.999              | 1                       | 1                        |           |
| Stapes                   | 1       | 1            | 1                       | 1               | 1            | 1                  | 1                       | 1                        | 1         |

**Table S16.** Ecological data for all species sampled in this study. For degree of fossoriality, the categories are: 0, aquatic species (which sometimes burrow in soft substrates); 1, tailed species (which have relatively short and stout bodies and zygokrotaphic skulls); 2, tailless species with zygokrotaphic skulls; 3, tailless species with stegokrotaphic skulls and open orbits; and 4, tailless species with closed orbits. All larval stage and reproductive mode information was taken from San Mauro *et al* 2014 [1] except for \* species, whose data was based on nearest relatives. \*\* information is from personal observation (Mark Wilkinson). Data collected for *Indotyphlus cf. battersbyi* was based on *Indotyphlus battersbyi*.

| Species                            | Degree of fossoriality as adult (0,1,2,3,4) | Life history strategy (larval stage absent/present) | Reproductive mode |
|------------------------------------|---------------------------------------------|-----------------------------------------------------|-------------------|
| <i>Atretochoana eiselti</i>        | 0                                           | absent*                                             | viviparous*       |
| <i>Boulengerula boulengeri</i>     | 4                                           | absent                                              | oviparous         |
| <i>Brasilotyphlus braziliensis</i> | 4                                           | absent*                                             | oviparous*        |
| <i>Caecilia tentaculata</i>        | 3                                           | absent*                                             | oviparous*        |
| <i>Chikila fulleri</i>             | 4                                           | absent                                              | oviparous         |
| <i>Chthonerpeton indistinctum</i>  | 2                                           | absent                                              | viviparous        |
| <i>Crotaphatrema bornmuelleri</i>  | 4                                           | absent*                                             | NA                |
| <i>Crotaphatrema lamottei</i>      | 4                                           | absent*                                             | NA                |
| <i>Dermophis mexicanus</i>         | 3                                           | absent                                              | viviparous        |
| <i>Epicrionops bicolor</i>         | 1                                           | present*                                            | oviparous*        |
| <i>Gegeneophis carnosus</i>        | 4                                           | absent*                                             | oviparous*        |
| <i>Geotrypetes seraphini</i>       | 2                                           | absent                                              | viviparous        |
| <i>Grandisonia alternans</i>       | 3                                           | NA                                                  | oviparous*        |
| <i>Gymnopsis multiplicata</i>      | 4                                           | absent                                              | viviparous        |
| <i>Herpele squalostoma</i>         | 4                                           | absent                                              | oviparous         |
| <i>Hypogeophis rostratus</i>       | 3                                           | absent                                              | oviparous         |
| <i>Ichthyophis bombayensis</i>     | 1                                           | present                                             | oviparous         |
| <i>Ichthyophis glutinosus</i>      | 1                                           | present                                             | oviparous         |
| <i>Ichthyophis nigroflavus</i>     | 1                                           | present*                                            | oviparous*        |
| <i>Idiocranium russeli</i>         | 3                                           | absent                                              | oviparous         |

|                                     |   |           |              |
|-------------------------------------|---|-----------|--------------|
| <i>Indotyphlus cf. battersbyi</i>   | 3 | absent*   | oviparous*   |
| <i>Luetkenotyphlus brasiliensis</i> | 3 | absent*   | oviparous*   |
| <i>Microcaecilia albiceps</i>       | 4 | absent*   | oviparous*   |
| <i>Mimosiphonops vermiculatus</i>   | 3 | absent*   | oviparous*   |
| <i>Nectocaecilia petersii</i>       | 2 | absent**  | viviparous** |
| <i>Oascaecilia ochrocephala</i>     | 4 | absent*   | oviparous*   |
| <i>Potomotyphlus kaupii</i>         | 0 | absent    | viviparous   |
| <i>Praslinia cooperi</i>            | 3 | present   | oviparous*   |
| <i>Rhinatrema bivitatum</i>         | 1 | present   | oviparous    |
| <i>Schistometopum gregorii</i>      | 3 | absent    | viviparous   |
| <i>Scolecormorphus kirkii</i>       | 2 | absent**  | viviparous** |
| <i>Siphonops annulatus</i>          | 3 | absent    | oviparous    |
| <i>Sylvacaecilia grandisonae</i>    | 3 | present** | oviparous**  |
| <i>Typhlonectes compressicauda</i>  | 0 | absent**  | viviparous** |
| <i>Uraeotyphlus oxyurus</i>         | 1 | present   | oviparous*   |

**Table S17.** Definitions for the 16 cranial regions analysed in this study, corresponding to coloured regions in Figure S1.

| <b>Region colour in Fig. S1</b> | <b>Region</b>                       | <b>Region description</b>                                                                                                                                                                                                                                                                                                                                                                                                                                                                                                                                                                                                                                                                                                                                                                                                                                                                                                                                                                                                                                                                                                                                                                                                                                                                                                                                                                                            |
|---------------------------------|-------------------------------------|----------------------------------------------------------------------------------------------------------------------------------------------------------------------------------------------------------------------------------------------------------------------------------------------------------------------------------------------------------------------------------------------------------------------------------------------------------------------------------------------------------------------------------------------------------------------------------------------------------------------------------------------------------------------------------------------------------------------------------------------------------------------------------------------------------------------------------------------------------------------------------------------------------------------------------------------------------------------------------------------------------------------------------------------------------------------------------------------------------------------------------------------------------------------------------------------------------------------------------------------------------------------------------------------------------------------------------------------------------------------------------------------------------------------|
| Purple                          | Os basale (ventral)                 | The ventral surface of the os basale, separated from the occipital region by a curve tracing the posterior muscle ridge. This is analogous to the basisphenoid module previous identified in birds [2].                                                                                                                                                                                                                                                                                                                                                                                                                                                                                                                                                                                                                                                                                                                                                                                                                                                                                                                                                                                                                                                                                                                                                                                                              |
| Pale pink                       | Frontal                             | Intraspecific analyses [3] have found the mesethmoid shape to correlate most strongly with the frontal, so the mesethmoid and frontal were patched as one region. The whole frontal and mesethmoid (down its midline).                                                                                                                                                                                                                                                                                                                                                                                                                                                                                                                                                                                                                                                                                                                                                                                                                                                                                                                                                                                                                                                                                                                                                                                               |
| Red                             | Quadrate (jaw joint)                | The articular surface of the quadrate.                                                                                                                                                                                                                                                                                                                                                                                                                                                                                                                                                                                                                                                                                                                                                                                                                                                                                                                                                                                                                                                                                                                                                                                                                                                                                                                                                                               |
| Grey                            | Maxillopalatine (interdental plate) | The ventral surface of the maxillopalatine immediately posterior to the primary tooth row.                                                                                                                                                                                                                                                                                                                                                                                                                                                                                                                                                                                                                                                                                                                                                                                                                                                                                                                                                                                                                                                                                                                                                                                                                                                                                                                           |
| Orange                          | Maxillopalatine (lateral)           | The prefrontal was included in the lateral maxillopalatine region, because it has been shown to fuse with the maxillopalatine through development [4] and not with the frontal as was previously believed [5]. This region was the most difficult to landmark, because of its large variation in shape and housing of sensory openings. The maxillopalatine can house the orbit, the tentacular foramen, both or neither. The orbit, when present, is either housed completely within the maxillopalatine or sits between the maxillopalatine and squamosal. The tentacular foramen is either in the maxillopalatine or between the maxillopalatine and nasopremaxilla. The tentacle and orbit openings can be connected or separated. In addition, the tentacular opening can be a foramen (closed hole) or a fossa (a groove passing through the entire length of the maxillopalatine). This huge variation means defining homologous landmarks and curves is very difficult. Consequently, landmarks and curves were used as “fences” to constrain the regions for patching, but most were then removed before analyses. This way, we could use just two templates for patching these regions, one template with a defined hole (a negligibly sized hole was used for maxillopalatines with no hole) and one template that separated the maxillopalatine into regions dorsal and ventral to the tentacular fossa. |
| Hot                             | Maxillopalatine                     | The ventral surface posterior to the secondary tooth row is known as the palatine shelf (or maxillary plate) and                                                                                                                                                                                                                                                                                                                                                                                                                                                                                                                                                                                                                                                                                                                                                                                                                                                                                                                                                                                                                                                                                                                                                                                                                                                                                                     |

|             |                          |                                                                                                                                                                                                                                                                                                                                                                                                                                                                                                                                                                                                                                                                                                                                                                                                                                                                                                 |
|-------------|--------------------------|-------------------------------------------------------------------------------------------------------------------------------------------------------------------------------------------------------------------------------------------------------------------------------------------------------------------------------------------------------------------------------------------------------------------------------------------------------------------------------------------------------------------------------------------------------------------------------------------------------------------------------------------------------------------------------------------------------------------------------------------------------------------------------------------------------------------------------------------------------------------------------------------------|
| pink        | (palatine shelf)         | partially or completely borders the choana. When closed, the two landmarks defining the anterior and posterior border extremes of the choana were adjacently placed, reflecting the closing of the choana.                                                                                                                                                                                                                                                                                                                                                                                                                                                                                                                                                                                                                                                                                      |
| Green       | Nasopremaxilla (dorsal)  | The dorsal surface of the nasopremaxilla (or nasal and premaxilla), and septomaxilla when present.                                                                                                                                                                                                                                                                                                                                                                                                                                                                                                                                                                                                                                                                                                                                                                                              |
| Gold        | Nasopremaxilla (palatal) | The ventral (palatal) surface of the nasopremaxilla posterior to the tooth row. The ventral surface consists of the naso/premaxilla in most specimens, but can be partially (e.g. <i>Geotrypetes seraphini</i> ) or completely ( <i>Scolecormorphus kirkii</i> and <i>Crotaphatrema lamottei</i> ) covered by an anterior projection of the vomer. These bones were patched as one region, defined as the bone surface between the anterior first and second rows of teeth.                                                                                                                                                                                                                                                                                                                                                                                                                     |
| Aqua        | Occipital condyle        | The occipital condyle. The occipital condyle was separated from the occipital region by two curves defining its border.                                                                                                                                                                                                                                                                                                                                                                                                                                                                                                                                                                                                                                                                                                                                                                         |
| Pale purple | Os basale (occipital)    | Occipital region of the os basale, excluding occipital condyle. Ventrally, this region ended at the muscle ridge.                                                                                                                                                                                                                                                                                                                                                                                                                                                                                                                                                                                                                                                                                                                                                                               |
| Black       | Parietal                 | We are interested in the external bone surface, so when a parietal-squamosal fenestra was present, we excluded the parietal region covered by the adductor musculature in life. This region is covered in fasciae so is considered internal. The parietal region was therefore defined by the parietal's medial, anterior, and posterior margins, and the lateral margin was defined by the adductor ridge. For specimens <i>Rhinatrema bivittatum</i> and <i>Epicrionops bicolor</i> , which represent the extreme (primitive) condition of a large adductor muscle, this region is especially small.                                                                                                                                                                                                                                                                                          |
| Pale blue   | Pterygoid                | There is current debate surrounding bone homology for the pterygoid region of caecilians. There is a putative pterygoid (also referred to as the ectopterygoid) in some specimens, and all (except <i>Scolecormorphus kirkii</i> and <i>Crotaphatrema bornmuelleri</i> ) have an anterior projection of the quadrate in ventral view, resembling the pterygoid in both shape and position. This is postulated to function as a pterygoid. Given the variable presence of the pterygoid and the pterygoid process of the quadrate, we defined the pterygoid region as both bones. Separate patching across specimens was necessary, as this region variably includes only one of the bones, both, or neither. <i>Scolecormorphus kirkii</i> and <i>Crotaphatrema bornmuelleri</i> , which have neither bone, were given a negligibly sized pterygoid region on the ventral side of the quadrate. |
| Pale        | Quadrate (lateral)       | The lateral surface of the quadrate was defined by its anterior, lateral and medial borders, and the posterior edge                                                                                                                                                                                                                                                                                                                                                                                                                                                                                                                                                                                                                                                                                                                                                                             |

|           |           |                                                                                                                                                                                                                                                                                                                                                                             |
|-----------|-----------|-----------------------------------------------------------------------------------------------------------------------------------------------------------------------------------------------------------------------------------------------------------------------------------------------------------------------------------------------------------------------------|
| green     |           | traced around the jaw joint and the stapes articulation, excluding both.                                                                                                                                                                                                                                                                                                    |
| Dark blue | Squamosal | The postfrontal was present in only three specimens and was patched with the squamosal. The posterior orbit margin, when the orbit is not enclosed within the maxillopalatine, consists of the squamosal or the postfrontal. Although the depressor musculature attaches onto the squamosal, this region is not covered by fasciae so was considered external bone surface. |
| Yellow    | Stapes    | The stapes is present in all but three of the caecilian dataset ( <i>Scolecormorphus kirkii</i> , <i>Crotaphatrema bornmuelleri</i> and <i>Crotaphatrema lamottei</i> ). For all species with a stapes present, the lateral surface of the stapes was captured.                                                                                                             |
| White     | Vomer     | The surface of the vomer posterior to the second row of teeth.                                                                                                                                                                                                                                                                                                              |



**Table S18.** Description of curves (consisting of sliding semilandmarks) placed onto each specimen. The manually-placed curve length refers to the amount of curve points placed in Landmark Editor, but, when exported from Landmark Editor, each curve is converted into eight or nine curve points. Following this, we subsampled the curve points to ensure all curve points were placed equidistantly along curves. These curve points were later slid to minimise bending energy across the specimens. Some curves (curves 58-75) were placed onto some specimens in order to aid the patching process but were deleted prior to analyses as they were not present across all specimens.

| <b>Original curves placed in Landmark Editor</b> | <b>Curves retained for analyses</b> | <b>Description</b>                                 | <b>Bone</b> | <b>Region</b>   | <b>Starting landmark</b> | <b>Ending landmark</b> | <b>Manually-placed curve length</b> | <b>Resampled curve length</b> |
|--------------------------------------------------|-------------------------------------|----------------------------------------------------|-------------|-----------------|--------------------------|------------------------|-------------------------------------|-------------------------------|
| SC1                                              | SC1                                 | Posteriorly, following midline of os basale        | Os basale   | Ventral surface | 10                       | 24                     | 7                                   | 15                            |
| SC2                                              | SC2                                 | Laterally, following ridge                         | Os basale   | Ventral surface | 24                       | 25                     | 4                                   | 10                            |
| SC3                                              | SC3                                 | Anteriorly, following lateral outline of os basale | Os basale   | Ventral surface | 25                       | 26                     | 9                                   | 20                            |
| SC4                                              | SC4                                 | Anteriorly along anterior process of os basale     | Os basale   | Ventral surface | 26                       | 10                     | 3                                   | 10                            |
| SC5                                              | SC5                                 | Posteriorly to foramen magnum                      | Os basale   | Occipital       | 50                       | 7                      | 1                                   | 3                             |
| SC6                                              | SC6                                 | Following edge of foramen magnum                   | Os basale   | Occipital       | 7                        | 27                     | 5                                   | 10                            |
| SC7                                              | SC7                                 | Following lateral edge of occipital condyle        | Os basale   | Occipital       | 27                       | 28                     | 5                                   | 10                            |
| SC8                                              | SC8                                 | Following foramen magnum                           | Os basale   | Occipital       | 28                       | 9                      | 1                                   | 2                             |

|      |      |                                                                                     |           |           |    |    |   |    |
|------|------|-------------------------------------------------------------------------------------|-----------|-----------|----|----|---|----|
|      |      | medially to midline                                                                 |           |           |    |    |   |    |
| SC9  | SC9  | Ventrally to ridge                                                                  | Os basale | Occipital | 9  | 24 | 3 | 5  |
| SC10 | SC10 | Follow outline of fenestra ovalis to maximum inflection point                       | Os basale | Occipital | 25 | 29 | 3 | 10 |
| SC11 | SC11 | Following the muscle ridge and not the bone margin (excluding the anterior process) | Os basale | Occipital | 29 | 30 | 4 | 15 |
| SC12 | SC12 | Following os basale-parietal suture to midline                                      | Os basale | Occipital | 30 | 50 | 6 | 15 |
| SC13 | SC13 | Following anterior jaw joint outline                                                | Quadrata  | Jaw joint | 11 | 12 | 3 | 6  |
| SC14 | SC14 | Following posterior jaw joint outline                                               | Quadrata  | Jaw joint | 12 | 54 | 2 | 3  |
| SC15 | SC15 | Following posterior jaw joint outline                                               | Quadrata  | Jaw joint | 54 | 11 | 2 | 3  |
| SC16 | SC16 | Posteriorly, following medial edge of frontal                                       | Frontal   | Frontal   | 69 | 70 | 4 | 15 |
| SC17 | SC17 | Laterally, following frontal-parietal suture                                        | Frontal   | Frontal   | 70 | 37 | 5 | 20 |
| SC18 | SC18 | Anteriorly, along lateral frontal margin                                            | Frontal   | Frontal   | 37 | 5  | 8 | 10 |
| SC19 | SC19 | Medially, following frontal-nasal suture                                            | Frontal   | Frontal   | 5  | 69 | 5 | 20 |

|      |      |                                                             |                 |                     |    |    |   |    |
|------|------|-------------------------------------------------------------|-----------------|---------------------|----|----|---|----|
| SC20 | SC20 | Posteriorly, following medial edge of parietal              | Parietal        | Parietal            | 38 | 6  | 8 | 20 |
| SC21 | SC21 | Laterally, following parietal-os basale suture              | Parietal        | Parietal            | 6  | 40 | 6 | 15 |
| SC22 | SC22 | Anteriorly, along lateral parietal margin                   | Parietal        | Parietal            | 40 | 39 | 7 | 15 |
| SC23 | SC23 | Medially, following parietal-frontal suture                 | Parietal        | Parietal            | 39 | 38 | 4 | 10 |
| SC24 | SC24 | Posteriorly, following the edge of the tooth row            | Maxillopalatine | Interdental surface | 14 | 15 | 8 | 20 |
| SC25 | SC25 | Medially, along posterior edge                              | Maxillopalatine | Interdental surface | 15 | 49 | 2 | 5  |
| SC26 | SC26 | Anteriorly, in front of second tooth row                    | Maxillopalatine | Interdental surface | 49 | 16 | 6 | 15 |
| SC27 | SC27 | Laterally, following anterior edge                          | Maxillopalatine | Interdental surface | 16 | 14 | 2 | 5  |
| SC28 | SC28 | Laterally, following edge of the tooth row                  | Nasopremaxilla  | Palatal surface     | 1  | 20 | 6 | 10 |
| SC29 | SC29 | Following the edge of the naso/premaxilla posteriorly       | Nasopremaxilla  | Palatal surface     | 20 | 21 | 5 | 15 |
| SC30 | SC30 | Anteriorly following the medial edge of the naso/premaxilla | Nasopremaxilla  | Palatal surface     | 21 | 1  | 3 | 10 |
| SC31 | SC31 | Laterally, following tooth row                              | Vomer           | Vomer               | 22 | 23 | 4 | 10 |

|      |      |                                                                                                      |                 |                 |    |    |   |    |
|------|------|------------------------------------------------------------------------------------------------------|-----------------|-----------------|----|----|---|----|
| SC32 | SC32 | Posteriorly, following edge of vomer                                                                 | Vomer           | Vomer           | 23 | 8  | 6 | 15 |
| SC33 | SC33 | Anteriorly, following the medial edge of the vomer                                                   | Vomer           | Vomer           | 8  | 22 | 5 | 15 |
| SC34 | SC34 | Posteriorly, following the edge of the tooth row                                                     | Maxillopalatine | Palatine shelf  | 17 | 18 | 7 | 20 |
| SC35 | SC35 | Following the bone margin                                                                            | Maxillopalatine | Palatine shelf  | 18 | 19 | 5 | 15 |
| SC36 | SC36 | Following the bone margin                                                                            | Maxillopalatine | Palatine shelf  | 19 | 51 | 4 | 10 |
| SC37 | SC37 | Following the margin of the choana                                                                   | Maxillopalatine | Palatine shelf  | 51 | 52 | 8 | 20 |
| SC38 | SC38 | Laterally, following the edge of the bone margin                                                     | Maxillopalatine | Palatine shelf  | 52 | 17 | 2 | 10 |
| SC39 | SC39 | Ventrally, following the quadrate-squamosal suture                                                   | Quadrate        | Lateral surface | 53 | 48 | 7 | 15 |
| SC40 | SC40 | Posteriorly, following the lateral edge of the quadrate                                              | Quadrate        | Lateral surface | 48 | 12 | 4 | 5  |
| SC41 | SC41 | Anteriorly, following the bone margin, tracing around where the stapes articulates with the quadrate | Quadrate        | Lateral surface | 11 | 53 | 6 | 15 |
| SC42 | SC42 | Posteriorly along the medial margin of the squamosal                                                 | Squamosal       | Squamosal       | 71 | 33 | 8 | 20 |
| SC43 | SC43 | Ventrally, following the posterior margin of the squamosal                                           | Squamosal       | Squamosal       | 33 | 34 | 6 | 15 |

|      |      |                                                                                    |                 |                   |    |    |    |    |
|------|------|------------------------------------------------------------------------------------|-----------------|-------------------|----|----|----|----|
| SC44 | SC44 | Anteriorly, following the lateral margin of the squamosal                          | Squamosal       | Squamosal         | 34 | 32 | 5  | 10 |
| SC45 | SC45 | Dorsally, following the anterior margin of the squamosal                           | Squamosal       | Squamosal         | 32 | 71 | 7  | 20 |
| SC46 | SC46 | Posteriorly, following the lateral edge of the maxillopalatine above the tooth row | Maxillopalatine | Lateral surface   | 41 | 42 | 7  | 30 |
| SC47 | SC47 | Following the lateral edge of the maxillopalatine                                  | Maxillopalatine | Lateral surface   | 42 | 2  | 2  | 5  |
| SC48 | SC48 | Following the medial margin of the occipital condyle                               | Os basale       | Occipital condyle | 28 | 27 | 4  | 10 |
| SC49 | SC49 | Posteriorly, following the medial margin of the nasopremaxilla                     | Nasopremaxilla  | Dorsal surface    | 3  | 4  | 10 | 20 |
| SC50 | SC50 | Laterally, following the nasopremaxilla-frontal suture                             | Nasopremaxilla  | Dorsal surface    | 4  | 13 | 4  | 10 |
| SC51 | SC51 | Ventrally, following the edge of the nasopremaxilla                                | Nasopremaxilla  | Dorsal surface    | 13 | 43 | 7  | 20 |
| SC52 | SC52 | Anteriorly, following the lateral edge of the nasopremaxilla, above the tooth row  | Nasopremaxilla  | Dorsal surface    | 43 | 3  | 5  | 10 |
| SC53 | SC53 | Following the outline of the nares, from the dorsal to                             | Nasopremaxilla  | Dorsal            | 45 | 44 | 3  | 5  |

|      |           |                                                                            |                        |                          |           |           |          |            |
|------|-----------|----------------------------------------------------------------------------|------------------------|--------------------------|-----------|-----------|----------|------------|
|      |           | anterior extreme                                                           |                        | surface                  |           |           |          |            |
| SC54 | SC54      | Following the outline of the nares, from the anterior to ventral extreme   | Nasopremaxilla         | Dorsal surface           | 44        | 47        | 3        | 5          |
| SC55 | SC55      | Following the outline of the nares, from the ventral to lateral extreme    | Nasopremaxilla         | Dorsal surface           | 47        | 46        | 3        | 5          |
| SC56 | SC56      | Following the outline of the nares, from the lateral to dorsal extreme     | Nasopremaxilla         | Dorsal surface           | 46        | 45        | 3        | 5          |
| SC57 | SC57      | Medially, following the ridge of the jaw joint                             | Quadrate               | Jaw joint                | 12        | 11        | 5        | 5          |
| SC58 | (removed) | <i>Laterally, following the base of the process (excluding the "stem")</i> | <i>Quadrate</i>        | <i>Pterygoid process</i> | <i>60</i> | <i>61</i> | <i>3</i> | <i>N/A</i> |
| SC59 | (removed) | <i>Anteriorly, following the lateral margin</i>                            | <i>Quadrate</i>        | <i>Pterygoid process</i> | <i>61</i> | <i>62</i> | <i>6</i> | <i>N/A</i> |
| SC60 | (removed) | <i>Posteriorly, following the medial margin</i>                            | <i>Quadrate</i>        | <i>Pterygoid process</i> | <i>62</i> | <i>60</i> | <i>5</i> | <i>N/A</i> |
| SC61 | (removed) | <i>Dorsally, following the posterior margin of the maxillopalatine</i>     | <i>Maxillopalatine</i> | <i>Lateral surface</i>   | <i>2</i>  | <i>63</i> | <i>9</i> | <i>N/A</i> |
| SC62 | (removed) | <i>Anteriorly, following the medial margin of the maxillopalatine</i>      | <i>Maxillopalatine</i> | <i>Lateral surface</i>   | <i>63</i> | <i>64</i> | <i>5</i> | <i>N/A</i> |
| SC63 | (removed) | <i>Ventrally, following the</i>                                            | <i>Maxillopalatine</i> | <i>Lateral</i>           | <i>64</i> | <i>2</i>  | <i>9</i> | <i>N/A</i> |

|                               |                  |                                                                                                                      |                        |                        |           |           |          |            |
|-------------------------------|------------------|----------------------------------------------------------------------------------------------------------------------|------------------------|------------------------|-----------|-----------|----------|------------|
|                               |                  | <i>anterior margin</i>                                                                                               |                        | <i>surface</i>         |           |           |          |            |
| <i>SC61<br/>(alternative)</i> | <i>(removed)</i> | <i>Dorsally, following the posterior margin of the ventral section of maxillopalatine</i>                            | <i>Maxillopalatine</i> | <i>Lateral surface</i> | <i>2</i>  | <i>63</i> | <i>9</i> | <i>N/A</i> |
| <i>SC62<br/>(alternative)</i> | <i>(removed)</i> | <i>Anteriorly, following the medial margin of the ventral section of the maxillopalatine</i>                         | <i>Maxillopalatine</i> | <i>Lateral surface</i> | <i>63</i> | <i>64</i> | <i>5</i> | <i>N/A</i> |
| <i>SC63<br/>(alternative)</i> | <i>(removed)</i> | <i>Ventrally, following the anterior margin of the ventral section of the maxillopalatine</i>                        | <i>Maxillopalatine</i> | <i>Lateral surface</i> | <i>64</i> | <i>2</i>  | <i>9</i> | <i>N/A</i> |
| <i>SC64</i>                   | <i>(removed)</i> | <i>Following the base of the stapes, from posterior to dorsal extreme</i>                                            | <i>Stapes</i>          | <i>Stapes</i>          | <i>56</i> | <i>58</i> | <i>2</i> | <i>N/A</i> |
| <i>SC65</i>                   | <i>(removed)</i> | <i>Following the base of the stapes, from dorsal to anterior extreme</i>                                             | <i>Stapes</i>          | <i>Stapes</i>          | <i>58</i> | <i>57</i> | <i>2</i> | <i>N/A</i> |
| <i>SC66</i>                   | <i>(removed)</i> | <i>Following the base of the stapes, from anterior to ventral extreme</i>                                            | <i>Stapes</i>          | <i>Stapes</i>          | <i>57</i> | <i>59</i> | <i>2</i> | <i>N/A</i> |
| <i>SC67</i>                   | <i>(removed)</i> | <i>Following the base of the stapes, from ventral to posterior extreme</i>                                           | <i>Stapes</i>          | <i>Stapes</i>          | <i>59</i> | <i>56</i> | <i>2</i> | <i>N/A</i> |
| <i>SC68</i>                   | <i>(removed)</i> | <i>Following the main axes of the stapes rod, taking the most direct, lateral route whilst following any natural</i> | <i>Stapes</i>          | <i>Stapes</i>          | <i>56</i> | <i>55</i> | <i>4</i> | <i>N/A</i> |

|                       |           |                                                                                                            |                        |                        |    |    |   |     |
|-----------------------|-----------|------------------------------------------------------------------------------------------------------------|------------------------|------------------------|----|----|---|-----|
|                       |           | <i>curve</i>                                                                                               |                        |                        |    |    |   |     |
| SC69                  | (removed) | <i>Following the outline of the orbit/tentacular foramen, from posterodorsal to anterodorsal extreme</i>   | <i>Maxillopalatine</i> | <i>Lateral surface</i> | 65 | 66 | 5 | N/A |
| SC70                  | (removed) | <i>Following the outline of the orbit/tentacular foramen, from anterodorsal to anteroventral extreme</i>   | <i>Maxillopalatine</i> | <i>Lateral surface</i> | 66 | 68 | 5 | N/A |
| SC71                  | (removed) | <i>Following the outline of the orbit/tentacular foramen, from anteroventral to posteroventral extreme</i> | <i>Maxillopalatine</i> | <i>Lateral surface</i> | 68 | 67 | 5 | N/A |
| SC72                  | (removed) | <i>Following the outline of the orbit/tentacular foramen, from posteroventral to posterodorsal extreme</i> | <i>Maxillopalatine</i> | <i>Lateral surface</i> | 67 | 65 | 5 | N/A |
| SC69<br>(alternative) | (removed) | <i>Anteriorly, following the edge of the dorsal section of the maxillopalatine</i>                         | <i>Maxillopalatine</i> | <i>Lateral surface</i> | 65 | 66 | 5 | N/A |
| SC70<br>(alternative) | (removed) | <i>Posteriorly, following the edge of the dorsal section of the maxillopalatine</i>                        | <i>Maxillopalatine</i> | <i>Lateral surface</i> | 66 | 68 | 5 | N/A |
| SC71<br>(alternative) | (removed) | <i>Posteriorly, following the edge of the dorsal section of the maxillopalatine</i>                        | <i>Maxillopalatine</i> | <i>Lateral surface</i> | 68 | 67 | 5 | N/A |
| SC72                  | (removed) | <i>Anteriorly, following the edge of the dorsal section of the</i>                                         | <i>Maxillopalatine</i> | <i>Lateral</i>         | 67 | 65 | 5 | N/A |



| <i>(alternative)</i> |                  | <i>maxillopalatine</i>                                   |                  | <i>surface</i>   |           |           |          |            |
|----------------------|------------------|----------------------------------------------------------|------------------|------------------|-----------|-----------|----------|------------|
| <i>SC73</i>          | <i>(removed)</i> | <i>Laterally along posterior margin of the pterygoid</i> | <i>Pterygoid</i> | <i>Pterygoid</i> | <i>72</i> | <i>73</i> | <i>2</i> | <i>N/A</i> |
| <i>SC74</i>          | <i>(removed)</i> | <i>Anteriorly along lateral margin of the pterygoid</i>  | <i>Pterygoid</i> | <i>Pterygoid</i> | <i>73</i> | <i>74</i> | <i>6</i> | <i>N/A</i> |
| <i>SC75</i>          | <i>(removed)</i> | <i>Posteriorly along medial margin of the pterygoid</i>  | <i>Pterygoid</i> | <i>Pterygoid</i> | <i>74</i> | <i>72</i> | <i>5</i> | <i>N/A</i> |

**Table S19.** Number of surface points projected onto each of the cranial regions.

| <b>Cranial region</b>               | <b>Number of surface points</b> |
|-------------------------------------|---------------------------------|
| Frontal                             | 56                              |
| Parietal                            | 63                              |
| Nasopremaxilla (dorsal)             | 60                              |
| Maxillopalatine (lateral)           | 96                              |
| Os basale (occipital)               | 88                              |
| Occipital condyle                   | 12                              |
| Quadrate (jaw joint)                | 30                              |
| Squamosal                           | 35                              |
| Quadrate (lateral)                  | 20                              |
| Os basale (ventral)                 | 96                              |
| Nasopremaxilla (palatal)            | 21                              |
| Vomer                               | 26                              |
| Maxillopalatine (interdental plate) | 26                              |
| Maxillopalatine (palatine shelf)    | 30                              |
| Pterygoid                           | 50                              |
| Stapes                              | 20                              |
| <b>TOTAL</b>                        | <b>729</b>                      |

**Table S20.** Alternative models of modular organisation tested in EMMLi analysis: 2A (1- not cheek, 2- cheek), 2B (1- anterior, 2-posterior), 2C (1-dorsal, 2-ventral), 2D (1-snout&cheek, 2-braincase), 2E (1-snout, 2-cheek&braincase), 3 (1-snout, 2-braincase, 3-cheek), 6A (approx. analogous to 1-vault, 2-anterior oral-nasal, 3-orbit, 4-basicranium, 5-zygomatic-pterygoid, 6-molar, see Goswami 2006), 6B (1-vault, 2-facial, 3-occipital, 4-cheek, 5-sphenoid, 6-palate). For 8 modules and higher, different groupings of the 16 cranial regions were tested.

| <b>Region</b>                       | <b>No modules</b> | <b>2A</b> | <b>2B</b> | <b>2C</b> | <b>2D</b> | <b>2E</b> | <b>3</b> | <b>6A</b> | <b>6B</b> | <b>8</b> | <b>9A</b> | <b>9B</b> | <b>12</b> | <b>15</b> | <b>16</b> |
|-------------------------------------|-------------------|-----------|-----------|-----------|-----------|-----------|----------|-----------|-----------|----------|-----------|-----------|-----------|-----------|-----------|
| Frontal                             | 1                 | 1         | 1         | 1         | 1         | 1         | 1        | 1         | 1         | 1        | 1         | 1         | 1         | 1         | 1         |
| Parietal                            | 1                 | 1         | 2         | 1         | 2         | 2         | 2        | 1         | 1         | 1        | 1         | 1         | 2         | 2         | 2         |
| Nasopremaxilla (dorsal)             | 1                 | 1         | 1         | 1         | 1         | 1         | 1        | 2         | 2         | 2        | 2         | 2         | 3         | 3         | 3         |
| Maxillopalatine (lateral)           | 1                 | 2         | 1         | 1         | 1         | 1         | 1        | 3         | 2         | 3        | 2         | 3         | 4         | 4         | 4         |
| Os basale (occipital)               | 1                 | 1         | 2         | 1         | 2         | 2         | 2        | 4         | 3         | 4        | 3         | 4         | 5         | 5         | 5         |
| Occipital condyle                   | 1                 | 1         | 2         | 1         | 2         | 2         | 2        | 4         | 3         | 4        | 3         | 4         | 5         | 6         | 6         |
| Quadrate (jaw joint)                | 1                 | 2         | 2         | 2         | 1         | 2         | 3        | 5         | 4         | 5        | 4         | 5         | 6         | 7         | 7         |
| Squamosal                           | 1                 | 2         | 2         | 1         | 1         | 2         | 3        | 5         | 4         | 5        | 5         | 5         | 6         | 8         | 8         |
| Quadrate (lateral)                  | 1                 | 2         | 2         | 1         | 1         | 2         | 3        | 5         | 4         | 5        | 5         | 5         | 6         | 7         | 9         |
| Os basale (ventral)                 | 1                 | 1         | 2         | 2         | 2         | 2         | 2        | 4         | 5         | 5        | 6         | 6         | 7         | 9         | 10        |
| Nasopremaxilla (palatal)            | 1                 | 1         | 1         | 2         | 1         | 1         | 1        | 2         | 6         | 6        | 7         | 7         | 8         | 10        | 11        |
| Vomer                               | 1                 | 1         | 1         | 2         | 1         | 1         | 1        | 2         | 6         | 6        | 7         | 7         | 9         | 11        | 12        |
| Maxillopalatine (interdental plate) | 1                 | 2         | 1         | 2         | 1         | 1         | 1        | 6         | 6         | 6        | 7         | 7         | 10        | 12        | 13        |
| Maxillopalatine (palatine shelf)    | 1                 | 2         | 1         | 2         | 1         | 1         | 1        | 6         | 6         | 6        | 7         | 7         | 10        | 13        | 14        |
| Pterygoid                           | 1                 | 2         | 2         | 2         | 1         | 2         | 3        | 5         | 4         | 7        | 8         | 8         | 11        | 14        | 15        |
| Stapes                              | 1                 | 1         | 2         | 1         | 2         | 2         | 2        | 5         | 4         | 8        | 9         | 9         | 12        | 15        | 16        |

### References for Additional File 1:

1. San Mauro D, Gower DJ, Müller H, Loader SP, Zardoya R, Nussbaum RA, et al. Life-history evolution and mitogenomic phylogeny of caecilian amphibians. *Mol Phylogenet Evol.* 2014;73:177–89.
2. Felice RN, Goswami A. Developmental origins of mosaic evolution in the avian cranium. *Proc Natl Acad Sci U S A.* 2018;115:555–60.
3. Marshall AF, Bardua C, Gower DJ, Wilkinson M, Sherratt E, Goswami A. Assessing variational modularity in caecilian (Amphibia: Gymnophiona) crania using a dense three-dimensional geometric morphometric approach (*in press*).
4. Wake MH, Hanken J. Development of the skull of *Dermophis mexicanus* (Amphibia: Gymnophiona), with comments on skull kinesis and amphibian relationships. *J Morphol.* 1982;173:203–23.
5. Marcus H, Stimmelmayer E, Porsch G. Beiträge zur Kenntnis der Gymnophionen. XXV. Die Ossifikation des Hypogeophisschdels. *Morphol Jahrb.* 1935;76:375–420.
